# Supplementary material
Source: MDPI journal article supplement (https://www.mdpi.com/1996-1073/8/11/12348)
Supplement: s2 [file s2]

## Sheet: README
Sheet name	Description
Summary World Fractions of GDP spent on energy
FractionGDPonEnergy_World	The fraction of GDP for the 44 country data set that was spent on each of the 9 aggregated energy commodities (lo = assuming lowest energy price in the data set, hi = assuming highest energy price in data set, act = using the listed price for a particular energy commidity in a particular country in a given year, and est = assuming an 'estimated' energy price for energy prices not in the IEA data …
FractionGDPonEnergyCountryAct	The fraction of GDP for each of the 44 countries using 'actual' data that are in the IEA data set for country-specific consumption quantities and prices.
FractionGDPonEnergyCountryEst	The fraction of GDP for each of the 44 countries using 'estimated' price data (missing consumption data are not estimated except for fractions of electricity from non-fossil electricity) to fill in data that are missing in the IEA data set for country-specific consumption quantities and prices.
Energy Intensity Ratios
EIRp_Elec_Res	Energy intensity ratio for each country for electricity consumed in the residential sector.
EIRp_Elec_Ind	Energy intensity ratio for each country for electricity consumed in the industrial sector.
EIRp_Coal_Elec	Energy intensity ratio for each country for coal consumed in the electricity generation sector.
EIRp_Coal_Ind	Energy intensity ratio for each country for coal consumed in the industrial sector.
EIRp_Coal_Res	Energy intensity ratio for each country for coal consumed in the residential sector.
EIRp_NG_Elec	Energy intensity ratio for each country for natural gas consumed in the electricity generation sector.
EIRp_NG_Ind	Energy intensity ratio for each country for natural gas consumed in the industrial sector.
EIRp_NG_Res	Energy intensity ratio for each country for natural gas consumed in the residential sector.
EIRp_Oil	Energy intensity ratio for each country for oil consumption overall with no sector specificity.
Fractions of Country-specific GDP on each energy commodity
PctGDPonOil_Estimated	The fraction of GDP spent on oil for each of the 44 countries using 'estimated' data (primarily prices) to fill in data that are missing in the IEA data set for country-specific consumption quantities and prices.
PctGDP_CoalRes_Estimated	The fraction of GDP spent on coal in residential sector for each of the 44 countries using 'estimated' data (primarily prices) to fill in data that are missing in the IEA data set for country-specific consumption quantities and prices.
PctGDP_CoalInd_Estimated	The fraction of GDP spent on coal in industrial sector for each of the 44 countries using 'estimated' data (primarily prices) to fill in data that are missing in the IEA data set for country-specific consumption quantities and prices.
PctGDP_CoalElec_Estimated	The fraction of GDP spent on coal for the electricity generation sector for each of the 44 countries using 'estimated' data (primarily prices) to fill in data that are missing in the IEA data set for country-specific consumption quantities and prices.
PctGDP_NGRes_Estimated	The fraction of GDP spent on natural gas in residential sector for each of the 44 countries using 'estimated' data (primarily prices) to fill in data that are missing in the IEA data set for country-specific consumption quantities and prices.
PctGDP_NGInd_Estimated	The fraction of GDP spent on natural gas in industrial sector for each of the 44 countries using 'estimated' data (primarily prices) to fill in data that are missing in the IEA data set for country-specific consumption quantities and prices.
PctGDP_NGElec_Estimated	The fraction of GDP spent on natural gas for the electricity generation sector for each of the 44 countries using 'estimated' data (primarily prices) to fill in data that are missing in the IEA data set for country-specific consumption quantities and prices.
PctGDP_ElecInd_Estimated	The fraction of GDP spent on electricity in the industrial sector for each of the 44 countries using 'estimated' data (primarily prices) to fill in data that are missing in the IEA data set for country-specific consumption quantities and prices.
PctGDP_ElecRes_Estimated	The fraction of GDP spent on electricity in the residential sector for each of the 44 countries using 'estimated' data (primarily prices) to fill in data that are missing in the IEA data set for country-specific consumption quantities and prices.
PctGDP_NFElecInd_Estimated	The estimated fraction of GDP spent on non-fossil electricity in the industrial sector for each of the 44 countries using 'estimated' data (primarily prices) to fill in data that are missing in the IEA data set for country-specific consumption quantities and prices.
PctGDP_NFElecRes_Estimated	The estimated fraction of GDP spent on non-fossil electricity in the residential sector for each of the 44 countries using 'estimated' data (primarily prices) to fill in data that are missing in the IEA data set for country-specific consumption quantities and prices.
PctGDPonOil_Actual	The fraction of GDP spent on oil for each of the 44 countries using 'actual' data (primarily prices) to fill in data that are missing in the IEA data set for country-specific consumption quantities and prices.
PctGDP_CoalRes_Actual	The fraction of GDP spent on coal in residential sector for each of the 44 countries using 'actual' data (primarily prices) to fill in data that are missing in the IEA data set for country-specific consumption quantities and prices.
PctGDP_CoalInd_Actual	The fraction of GDP spent on coal in industrial sector for each of the 44 countries using 'actual' data (primarily prices) to fill in data that are missing in the IEA data set for country-specific consumption quantities and prices.
PctGDP_CoalElec_Actual	The fraction of GDP spent on coal for the electricity generation sector for each of the 44 countries using 'actual' data (primarily prices) to fill in data that are missing in the IEA data set for country-specific consumption quantities and prices.
PctGDP_NGRes_Actual	The fraction of GDP spent on natural gas in residential sector for each of the 44 countries using 'actual' data (primarily prices) to fill in data that are missing in the IEA data set for country-specific consumption quantities and prices.
PctGDP_NGInd_Actual	The fraction of GDP spent on natural gas in industrial sector for each of the 44 countries using 'actual' data (primarily prices) to fill in data that are missing in the IEA data set for country-specific consumption quantities and prices.
PctGDP_NGElec_Actual	The fraction of GDP spent on natural gas for the electricity generation sector for each of the 44 countries using 'actual' data (primarily prices) to fill in data that are missing in the IEA data set for country-specific consumption quantities and prices.
PctGDP_ElecInd_Actual	The fraction of GDP spent on electricity in the industrial sector for each of the 44 countries using 'actual' data (primarily prices) to fill in data that are missing in the IEA data set for country-specific consumption quantities and prices.
PctGDP_ElecRes_Actual	The fraction of GDP spent on electricity in the residential sector for each of the 44 countries using 'actual' data (primarily prices) to fill in data that are missing in the IEA data set for country-specific consumption quantities and prices.
PctGDP_NFElecInd_Actual	The estimated fraction of GDP spent on non-fossil electricity in the industrial sector for each of the 44 countries using 'actual' data as available in the IEA data set for country-specific consumption quantities and prices.
PctGDP_NFElecRes_Actual	The estimated fraction of GDP spent on non-fossil electricity in the residential sector for each of the 44 countries using 'actual' data as available in the IEA data set for country-specific consumption quantities and prices.
PrimaryEnergyRatio	The fraction of Total Primary Energy Supply (TPES) calculated in this paper as compared to the TPES reported by the IEA. A value less than 1 indicates a lower energy supply calculation than TPES.
GEPR_Direct	Gross External Power Ratio (GEPR) considering only direct power (energy/yr) inputs. The ratio of "total production (TJ)" to "total energy industry own use (EIOU)" for each of the 44 countries in the IEA data set. "World, all countries available" is the average of all countries, weighted by total energy production by each country, for all countries that do have data for a given year. "World, 44 co…
NEPR_Direct	Net External Power Ratio (NEPR) considering only direct power (energy/yr) inputs. The ratio of "total primary energy production (TJ) minus total energy industry own use (EIOU)" to "EIOU" for each of the 44 countries in the IEA data set. "World, all countries available" is the average of all countries, weighted by total energy production by each country, for all countries that do have data for a g…
NetImportRatio	The ratio of net energy imports to energy supply: (imported energy - exported energy)/TPES for selected years.
World Input-Output Database Calculations
WIOD_IC_GDP	Intermediate Consumption (domestic and imports) plus Gross Capital Formation (domestic and imports) for 3 "energy sectors" of the WIOD database ("mining and quarrying"; "coke, refined petroleum, and nuclear fuel"; and "electricity, gas, and water supply") divided by GDP. Calculated for each of the 28 countries in the WIOD database, using the WIOD national sheets.

## Sheet: FractionGDPonEnergyWorld
Year	CoalElec_low	CoalElec_act	CoalElec_est	CoalElec_hi	CoalInd_low	CoalInd_act	CoalInd_est	CoalInd_hi	CoalRes_low	CoalRes_act	CoalRes_est	CoalRes_hi	NGElec_low	NGElec_act	NGElec_est	NGElec_hi	NGInd_low	NGInd_act	NGInd_est	NGInd_hi	NGRes_low	NGRes_act	NGRes_est	NGRes_hi	Oil_low	Oil_act	Oil_est	Oil_hi	ElecInd_low	ElecInd_act	ElecInd_est	ElecInd_hi	ElecRes_low	ElecRes_act	ElecRes_est	ElecRes_hi	NonFossilElecInd_low	NonFossilElecInd_act	NonFossilElecInd_est	NonFossilElecInd_hi	NonFossilElecRes_low	NonFossilElecRes_act	NonFossilElecRes_est	NonFossilElecRes_hi	No RefOil_min	RefOil_act	RefOil_est	No RefOil_max
1978	0.00114821	0.00463802	0.00559309	0.042678	0.00213316	0.00608541	0.00841243	0.0419483	0.000326536	0.000342587	0.00181331	0.00599087	0.000314604	0.000949066	0.00103845	0.00232373	0.00100396	0.00371601	0.00402443	0.0288416	0.00142912	0.00272338	0.00280302	0.0116659	0.031306	0.0255852	0.0339977	0.0539792	0.00664957	0.0146519	0.0171011	0.0355683	0.00499548	0.0095932	0.0101378	0.0194382	0.00196376	0.00426286	0.00492064	0.010504	0.00147092	0.00273559	0.00290209	0.00572356	--	0.00169775	0.000324567	--
1979	0.00117705	0.00500027	0.00583846	0.0383372	0.00373266	0.00604234	0.00894172	0.0412166	0.000331674	0.000406909	0.00190883	0.0063244	0.000327058	0.00117936	0.00125725	0.00291278	0.0010098	0.0039761	0.00430795	0.0259411	0.00201542	0.00287133	0.00302753	0.0133261	0.0637678	0.0304301	0.0698441	0.064497	0.006793	0.0150695	0.0176297	0.0331242	0.00485301	0.00964052	0.0102187	0.0185149	0.00201587	0.00434304	0.00506663	0.00982984	0.00143297	0.00275153	0.00293575	0.00546699	--	0.00193869	0.000285998	--
1980	0.00029094	0.00534338	0.00638273	0.0406851	0.00461572	0.00642536	0.00927396	0.0395575	0.000371485	0.000464544	0.00214964	0.00624678	0.00037778	0.00149217	0.00155101	0.00448022	0.00112508	0.00462905	0.00502011	0.0435745	0.00188124	0.00316861	0.0033904	0.0128442	0.0569224	0.0439526	0.0651545	0.0684857	0.00886948	0.0168678	0.0195823	0.0420644	0.00506835	0.0104978	0.0110886	0.020947	0.00264558	0.00491334	0.00573256	0.0125469	0.00150905	0.0030076	0.0032118	0.00623675	--	0.00221598	0.000746105	--
1981	0.000677666	0.00512869	0.00601398	0.0305339	0.00375013	0.00576393	0.00889391	0.0330723	0.000367004	0.000410062	0.00190039	0.00544766	0.000418902	0.00160973	0.00169152	0.00461212	0.00124625	0.00485095	0.00526798	0.0287268	0.00181342	0.00313751	0.00336291	0.012854	0.0550291	0.0405412	0.0588787	0.063155	0.00858067	0.0164348	0.0190549	0.0445927	0.00326633	0.0102484	0.0108534	0.0218578	0.00266472	0.00492014	0.00575907	0.0138483	0.00100902	0.00303024	0.00325156	0.00675227	--	0.00189889	0.000800009	--
1982	0.00131196	0.00496284	0.00574314	0.0182735	0.00364288	0.00547618	0.00800998	0.031117	0.000340487	0.000352039	0.00176056	0.0050648	0.000367082	0.00154771	0.0016561	0.00447095	0.00104731	0.0049684	0.00530352	0.0234134	0.00168166	0.00342423	0.00360932	0.0109569	0.0470018	0.0338641	0.0495627	0.0544129	0.00848859	0.0156303	0.0184933	0.0396409	0.00488855	0.00999264	0.0106903	0.018635	0.00273689	0.00495515	0.00584434	0.012781	0.00160244	0.00316271	0.00339857	0.00610847	--	0.00157391	0.000476421	--
1983	0.00127253	0.00458901	0.00505179	0.0163638	0.00425932	0.00486613	0.00643938	0.0266478	0.000303167	0.000290159	0.00147098	0.00422782	0.000467172	0.001361	0.0015444	0.00374755	0.00132421	0.00472005	0.00517538	0.022801	0.00151337	0.00349863	0.00366661	0.0106227	0.0401963	0.0278468	0.0409048	0.0444326	0.00686994	0.0150933	0.0181299	0.0389002	0.00396717	0.00985745	0.0106043	0.0192531	0.00228709	0.0049334	0.00590377	0.0129504	0.00134895	0.003223	0.00349634	0.0065466	--	0.00161677	0.000190295	--
1984	0.00101837	0.00404003	0.00444216	0.0141004	0.00359646	0.00447306	0.00576462	0.0248682	0.000258531	0.000234473	0.00126036	0.00382424	0.00097863	0.00145007	0.00188135	0.00372312	0.00266314	0.00455567	0.00559052	0.0214711	0.00131428	0.00358125	0.00370972	0.010794	0.0366413	0.0256799	0.0376574	0.0404021	0.00739519	0.0145572	0.0175225	0.0382757	0.00393622	0.00950566	0.0102681	0.0186889	0.0025647	0.00491757	0.0059341	0.0132742	0.00138635	0.00322353	0.00351404	0.0065823	--	0.00168785	8.41e-05	--
1985	0.000698805	0.00379532	0.00429805	0.013961	0.00174076	0.0042304	0.00552256	0.0229579	0.000242958	0.000263193	0.00138646	0.00409579	0.000995339	0.00128591	0.00174696	0.00372887	0.00243184	0.00407091	0.00504938	0.019813	0.00107099	0.00341425	0.00350024	0.0102263	0.0326031	0.022499	0.0334042	0.0356102	0.00723329	0.0141243	0.016918	0.0372223	0.00343915	0.00927682	0.0100282	0.018156	0.00260997	0.00503688	0.00604715	0.0134308	0.00126246	0.00331824	0.00361642	0.00666476	--	0.00154192	-0.00013075	--
1986	0.000743391	0.00384747	0.00439293	0.0170768	0.00192352	0.00492176	0.00608095	0.0322759	0.000227041	0.00030406	0.00163438	0.00526141	0.00100012	0.000829185	0.00137266	0.00385491	0.00253501	0.00335178	0.00450312	0.0231349	0.00116207	0.00347639	0.00359059	0.0127827	0.0153526	0.0113511	0.0175665	0.0202865	0.00840306	0.0153756	0.0183982	0.0484757	0.00435288	0.0101094	0.0109291	0.0240794	0.00307754	0.00579473	0.0068475	0.0177538	0.00163195	0.00384103	0.00415658	0.00902766	--	0.00127744	-8.54e-05	--
1987	0.000960495	0.00387787	0.00441969	0.0193979	0.00232372	0.00521396	0.00634609	0.0371253	0.000208435	0.000302385	0.00179152	0.00561504	0.000954295	0.000797155	0.00132844	0.00377359	0.00279148	0.00306433	0.00431624	0.0224401	0.00121529	0.00327919	0.00339629	0.0132395	0.0202331	0.0130292	0.0208642	0.0218425	0.00891423	0.0161133	0.0193871	0.0516415	0.00368322	0.0107682	0.0116919	0.0261854	0.00324999	0.00613998	0.00726295	0.0188277	0.0013676	0.00412483	0.00446607	0.00972282	--	0.00133543	-0.000234911	--
1988	0.000895649	0.0036832	0.00427364	0.0191762	0.00210374	0.00502626	0.00619986	0.0372584	0.000186242	0.000245098	0.00159014	0.00531415	0.00105066	0.000717497	0.00133087	0.00332421	0.0034029	0.0029343	0.0045024	0.0210681	0.00110444	0.00316792	0.00328218	0.0136807	0.0148739	0.0111025	0.0164033	0.0179261	0.00947188	0.0167444	0.0199397	0.0534489	0.00447169	0.0108509	0.0117485	0.0276682	0.00351938	0.00693285	0.00766105	0.0198596	0.00168253	0.00434127	0.0045581	0.0104105	--	0.00111109	-0.000324033	--
1989	0.000521487	0.00334567	0.00395149	0.0177566	0.00184915	0.00440469	0.0055093	0.0310243	0.000141472	0.000201944	0.00131834	0.00423759	0.000970761	0.000764696	0.00133282	0.00310919	0.00324364	0.00276361	0.00426483	0.0191553	0.00100582	0.00306719	0.00316347	0.0132109	0.0169467	0.0125574	0.0186726	0.019994	0.00865833	0.0156825	0.0190393	0.0455348	0.00409295	0.0101723	0.0111706	0.0239976	0.00313259	0.00634564	0.00709318	0.0164745	0.00151595	0.00399078	0.00421697	0.00888822	--	0.00102639	-0.000434104	--
1990	0.000875736	0.00431145	0.00465956	0.0224579	0.0012647	0.00332134	0.00499528	0.029801	0.000135735	0.000190471	0.00118848	0.00573053	0.000541083	0.000839815	0.000946041	0.00242815	0.00164561	0.00290286	0.00370754	0.0165503	0.000767747	0.00319391	0.00329776	0.0114959	0.0173475	0.0207087	0.0212722	0.0230986	0.00791067	0.0165141	0.0186787	0.0391707	0.00325128	0.0106716	0.0116112	0.0230673	0.00296781	0.00666973	0.0072041	0.0146955	0.00124472	0.00435494	0.00457994	0.0088311	--	0.000954659	-0.000685685	--
1991	0.000862059	0.00387541	0.00399945	0.0199722	0.00125781	0.00235267	0.00382898	0.0226981	0.000154177	0.000196276	0.00142314	0.00566538	0.000571265	0.000804753	0.000917142	0.00236595	0.00161337	0.00275989	0.00355564	0.0168625	0.00076748	0.00351695	0.0036124	0.0123676	0.0156811	0.0169325	0.0175466	0.0203037	0.00788125	0.0167772	0.0190961	0.0419619	0.0019374	0.0108038	0.0118144	0.0235835	0.00297545	0.00673065	0.00732314	0.0158421	0.000752919	0.00447817	0.00470883	0.0091651	--	0.000823883	-0.000600569	--
1992	0.000882205	0.00372587	0.00468432	0.0218276	0.00120827	0.00382445	0.00485999	0.0234626	0.000141504	0.000538073	0.000751943	0.00528462	0.00046113	0.000758841	0.000869231	0.00230797	0.00149265	0.00277825	0.00349504	0.0166382	0.000718931	0.0034395	0.00356425	0.0127257	0.0150147	0.0159234	0.0164622	0.0178851	0.00809465	0.0172713	0.01927	0.043617	0.0033124	0.0109397	0.0119086	0.0243945	0.00304016	0.00667196	0.00741682	0.0163815	0.00128256	0.00453038	0.00477732	0.0094455	--	0.000776046	-0.000716066	--
1993	0.000796904	0.00331668	0.00429249	0.0200877	0.000963428	0.00347895	0.00402846	0.0205527	0.000111689	0.000586097	0.000784615	0.00372462	8.26e-05	0.000745852	0.000769058	0.00228479	0.000415938	0.00288573	0.00305507	0.0170191	1.76e-05	0.00333644	0.00336009	0.015061	0.0127308	0.0137204	0.0142064	0.0154693	0.00767863	0.016982	0.0188614	0.0489212	0.000317615	0.0106898	0.0113431	0.0268707	0.00292939	0.0066366	0.00737143	0.0186633	0.000124	0.00449755	0.00465308	0.0105033	--	0.000478355	-0.000790239	--
1994	0.000751443	0.00311503	0.00352204	0.0197613	0.000914642	0.00221226	0.00290981	0.0189368	8.55e-05	0.000402863	0.000593497	0.00299696	0.000689297	0.000736502	0.000900683	0.00231948	0.000838211	0.00296357	0.00315872	0.0162444	1.79e-05	0.00323232	0.00328959	0.0152118	0.0118275	0.0125792	0.0129322	0.0140328	0.00731064	0.0167567	0.018406	0.0506956	0.000614119	0.0109127	0.0115515	0.0283388	0.00275568	0.00646527	0.00712131	0.0191092	0.000237354	0.00450215	0.00465866	0.0109528	--	0.000442577	-0.000734795	--
1995	0.000789877	0.00317136	0.00361658	0.0223588	0.000975252	0.00178127	0.0031486	0.00695877	0.000103	0.000468923	0.000655978	0.00334947	0.000543511	0.000746188	0.000883453	0.00229699	0.00138608	0.00265179	0.00328721	0.0166949	0.000613678	0.00335128	0.00355612	0.0158296	0.0124035	0.0135234	0.0135799	0.014932	0.00784255	0.0170779	0.0187483	0.0537809	0.00291837	0.0113309	0.0118982	0.0300024	0.00298783	0.00665462	0.00731248	0.0204893	0.00113763	0.00471425	0.00490558	0.0116955	--	0.000483953	-0.000704365	--
1996	0.000738322	0.00212112	0.00262454	0.00769282	0.000845888	0.00157936	0.00186764	0.00667607	4.54e-05	0.000192878	0.000467446	0.00147331	0.000771944	0.000799586	0.00104172	0.00202305	0.00134817	0.00295437	0.00354685	0.0141266	0.000611128	0.00355318	0.00375094	0.0150558	0.015242	0.015858	0.0160072	0.0171866	0.00672493	0.0159838	0.017592	0.0450102	0.00295481	0.0108409	0.0113731	0.0250954	0.00254087	0.0062084	0.00682731	0.0170061	0.00115494	0.00461177	0.00478105	0.009809	--	0.000677791	-0.000880266	--
1997	0.000697474	0.00193035	0.00251728	0.0065679	0.000718233	0.00159472	0.00180247	0.00527205	7.95e-05	0.000404076	0.00051252	0.00239013	3.35e-05	0.000935329	0.00103964	0.00228354	0.000724161	0.00292836	0.00325028	0.0148661	0.000444172	0.00316428	0.00335041	0.0135277	0.0126984	0.0143956	0.0144971	0.0165512	0.00654498	0.014203	0.0165185	0.0407629	0.0033113	0.00977301	0.0102254	0.0214487	0.0024346	0.00555903	0.00625113	0.015163	0.00127312	0.00404409	0.00416958	0.0082465	--	0.00054123	-0.000943086	--
1998	0.000640941	0.00178866	0.00237688	0.00590709	0.000674507	0.00150643	0.00164993	0.00506588	5.39e-05	0.000272606	0.000363747	0.00197364	9.84e-05	0.000588769	0.00120682	0.00203832	0.000988919	0.00250669	0.0029607	0.0110699	0.00012106	0.00287325	0.00298111	0.0105296	0.00824128	0.00913933	0.00924949	0.0107575	0.00548723	0.0130659	0.0154063	0.0353527	0.00190101	0.00903689	0.00978235	0.0219953	0.00201995	0.00507741	0.00592581	0.013014	0.000717286	0.00367901	0.00391693	0.00829923	--	0.000445534	-0.00064381	--
1999	0.000581336	0.00168664	0.00218862	0.00515431	0.000674352	0.00127918	0.00138931	0.00437457	4.38e-05	0.000243455	0.000340058	0.001828	0.000209826	0.000625754	0.00133185	0.00191133	0.00107832	0.00230248	0.00285691	0.0116001	0.000152524	0.00277273	0.00294571	0.0116534	0.0111653	0.0121406	0.0123352	0.0129524	0.0046684	0.0120505	0.0146817	0.0385132	0.00248864	0.00865748	0.00953028	0.0214423	0.00171582	0.00439117	0.00560753	0.0141551	0.000938989	0.00334629	0.0037559	0.00809041	--	0.000507223	-0.000703831	--
2000	0.000540552	0.00164559	0.00215093	0.00524651	0.00060274	0.00126633	0.0013591	0.00379786	4.14e-05	0.000216398	0.000270019	0.00152301	0.000337401	0.000935773	0.00173024	0.00233359	0.000484998	0.00302467	0.00337043	0.0130483	8.61e-05	0.00268893	0.0029476	0.0123877	0.0174907	0.0188132	0.0190147	0.020787	0.0045678	0.0119457	0.014318	0.0380154	0.00241547	0.00802862	0.00883661	0.021	0.00164198	0.00421787	0.0051992	0.0136654	0.000890339	0.00300313	0.00338603	0.00774055	--	0.000419227	-0.00096477	--
2001	0.000478363	0.0017162	0.0022255	0.00656286	0.00054208	0.00121389	0.00133161	0.00366151	3.67e-05	0.000195885	0.000263867	0.00143023	0.000190554	0.000964341	0.00161546	0.00232792	0.000568837	0.00315516	0.00354667	0.0111397	0.0001	0.00278891	0.00303091	0.0107931	0.0139613	0.0153131	0.0155176	0.0173558	0.00345446	0.0111714	0.0130083	0.0327408	0.0023947	0.00774562	0.00859735	0.0188893	0.00123311	0.00400529	0.00479315	0.0116872	0.000875183	0.00287314	0.00327198	0.00690343	--	0.000591758	-0.000752979	--
2002	0.000390196	0.00157511	0.00220756	0.0055843	0.00105118	0.00134405	0.00142545	0.00380378	3.84e-05	0.000192103	0.000302524	0.0017886	0.000228862	0.000823788	0.00147078	0.00243067	0.000691149	0.00280599	0.00320931	0.00968789	0.000117	0.00260902	0.00290551	0.00989729	0.0139714	0.0144622	0.0153892	0.0162991	0.00311967	0.0107917	0.012522	0.0293322	0.00308656	0.00782685	0.00874523	0.0203165	0.0010925	0.00380273	0.00451796	0.010272	0.00110993	0.00285235	0.00326882	0.00730583	--	0.000612937	-0.000700167	--
2003	0.000607063	0.00157364	0.00238226	0.00618343	0.00086447	0.00154228	0.00165976	0.00483444	5.76e-05	5.65e-05	0.000432592	0.00171566	0.000286966	0.0010669	0.00174253	0.00234914	0.000932574	0.00384135	0.00432111	0.0103578	0.000162066	0.00313996	0.00355527	0.0109614	0.0164199	0.0173803	0.0175432	0.0192213	0.00471693	0.0117653	0.0140527	0.0370161	0.00388091	0.00842192	0.00963963	0.0247858	0.00160854	0.00407052	0.00493177	0.012623	0.0013604	0.00306227	0.00357354	0.00868834	--	0.000757766	-0.000868559	--
2004	0.000670544	0.00179956	0.00288636	0.00887289	0.000863375	0.00221231	0.00252149	0.00740624	6.68e-05	4.51e-05	0.000491278	0.00211854	0.000782789	0.00129934	0.00202452	0.00266102	0.00113129	0.00415405	0.00465659	0.0101515	0.000194334	0.00360832	0.00361107	0.0109185	0.0200879	0.0216862	0.0221156	0.0248485	0.00535901	0.0121584	0.0146279	0.0400192	0.00558846	0.0086449	0.0101488	0.0264077	0.00184323	0.00434739	0.00524046	0.0137646	0.00198296	0.00324848	0.00378274	0.00937026	--	0.000941117	-0.00119414	--
2005	0.000801825	0.00193709	0.00324551	0.00997835	0.000942072	0.000978401	0.00285311	0.00767343	6.11e-05	6.41e-05	0.000474969	0.00175417	0.000848573	0.00176197	0.00245559	0.00329452	0.00131324	0.00481049	0.00545955	0.00987752	0.00291249	0.00387492	0.00440751	0.0100777	0.027476	0.0290014	0.0294359	0.0320297	0.0052972	0.0123436	0.0149743	0.0419326	0.00426307	0.00867147	0.0101261	0.0269465	0.00180095	0.00437121	0.00528873	0.0142564	0.00148745	0.00319329	0.00373152	0.00940206	--	0.00140027	-0.0015201	--
2006	0.00176674	0.00190176	0.00325685	0.00948985	0.00159478	0.000919555	0.00273484	0.00733921	0.000454558	4.13e-05	0.000550722	0.00121408	0.000858786	0.0017053	0.00251578	0.00428434	0.00145455	0.00479727	0.005551	0.012274	0.0030688	0.00392672	0.004583	0.00915209	0.0310297	0.0330067	0.033443	0.0357702	0.00510288	0.0126417	0.0158242	0.0490761	0.00521592	0.0086495	0.0107212	0.0283745	0.00171871	0.00450001	0.00550059	0.0165294	0.00181277	0.00325584	0.00387712	0.00986141	--	0.00135302	-0.00175718	--
2007	0.0018974	0.00199802	0.00377766	0.0107655	0.00169669	0.0010358	0.003214	0.00801711	0.00067093	5.5e-05	0.000725184	0.00128122	0.000856913	0.00187874	0.00274789	0.00455078	0.00172878	0.00487846	0.0055852	0.0137474	0.00345374	0.00388588	0.00468431	0.0105166	0.0329989	0.0347184	0.0351025	0.0384377	0.00884772	0.0133185	0.0166774	0.0547304	0.00538344	0.00888636	0.0110921	0.0296195	0.00284805	0.00470219	0.00559601	0.0176175	0.00178942	0.00332084	0.00383072	0.00984533	--	0.00104254	-0.00207408	--
2008	0.0020456	0.00269431	0.00564963	0.0190811	0.0019221	0.00108433	0.00482718	0.00902969	0.000544609	7.53e-05	0.000675305	0.00141477	0.00100541	0.0023793	0.00335744	0.00624435	0.00219869	0.00601879	0.00702681	0.0171923	0.00316113	0.0042647	0.00500662	0.0119334	0.0388495	0.0467965	0.0469865	0.0522207	0.011419	0.0148731	0.0187947	0.0657976	0.00513936	0.00952099	0.0117546	0.0335744	0.00373611	0.0053749	0.00644932	0.0215278	0.00174331	0.00364016	0.0041754	0.0113887	--	0.000925741	-0.00298084	--
2009	0.00184829	0.00233923	0.00474048	0.0141993	0.00171923	0.000933891	0.00373703	0.0089221	0.00053647	8.53e-05	0.000645485	0.00147914	0.00127759	0.00145103	0.00265504	0.00495569	0.00184852	0.00419194	0.00500382	0.0163079	0.00284029	0.00399043	0.00468267	0.0112422	0.0285367	0.029621	0.0295272	0.0335087	0.0106898	0.0140541	0.0180262	0.0624631	0.00501423	0.00968102	0.0120191	0.0322469	0.00358182	0.00536708	0.00647735	0.0209295	0.0017551	0.00391437	0.00445941	0.0112872	--	0.000733971	-0.00197071	--
2010	0.00375478	0.00193919	0.00513835	0.0151552	0.00203784	0.000727125	0.00353586	0.00750248	0.000562026	9.7e-05	0.000652531	0.0013609	0.00203521	0.00145198	0.00311803	0.00545959	0.00242605	0.00441305	0.00539713	0.0147575	0.00297409	0.00367304	0.00441171	0.0114456	0.0359564	0.0371671	0.0371743	0.0390687	0.0115603	0.0136021	0.0189722	0.0597773	0.00596448	0.00959814	0.0123953	0.0315683	0.00385854	0.00526966	0.00684726	0.0199521	0.0020762	0.00389002	0.00461697	0.0109888	--	0.000787156	-0.00237632	--

## Sheet: FractionGDPonEnergyCountryAct
Year	United States	United Kingdom	Spain	Russia	Netherlands	Japan	Italy	Germany		Canada	France	Austria	Denmark	Finland	Norway	Sweden	Argentina	Australia	Belgium	Brazil	China	Chinese Taipei	Columbia	Czech Republic	Greece	Hungary	India	Indonesia	Iran	Iraq	Korea	Kuwait	Libya	Malaysia	Mexico	New Zealand	Nigeria	Poland	Portugal	Qatar	Saudi Arabia	Soth Africa	Switzerland	Turkey	Venezuela	World
1978	0.0867296	0.0219263	0.00671859		0.0285361	0.0202376	0.00976271	0.0833022		0.0338428	0.0175032	0.0334274	0.00742557	0.0095176	0.0216378	0.0397522		0.0112886	0.00279276					0.00962682	0.00761281		0.00727626			0.0154497	0.00319151	0.0796849	0.0255102		0.00317482	0.0212253			0.00685158	0.00537673	0.0369686	0.00642091	0.0200847	0.00865998		0.0527359
1979	0.0973771	0.0263172	0.00925379		0.0304266	0.0189124	0.0103457	0.0829929		0.033932	0.0192449	0.0355632	0.00831831	0.0109871	0.0230534	0.0464392		0.0119287	0.00310566					0.0124435	0.00561571		0.0183937			0.0264589	0.00445863	0.165356	0.042434		0.00354029	0.0229679			0.00605242	0.0112816	0.0719461	0.00672272	0.0406011	0.0152018		0.0589396
1980	0.0988452	0.0675927	0.054423		0.111921	0.0662098	0.0522407	0.124506		0.10787	0.0269967	0.0706073	0.0344515	0.0129447	0.0509429	0.0869074		0.0542752	0.0676381					0.0102004	0.0506227	0.00648875	0.0219256			0.0325354	0.0172821	0.233882	0.0543753		0.00377578	0.0547018			0.0493631	0.0123479	0.0807388	0.00784872	0.0472103	0.0173349		0.0756126
1981	0.0957318	0.0637829	0.0532087		0.103662	0.0621188	0.0504701	0.109501		0.104945	0.0257311	0.0605614	0.0313473	0.00351308	0.0479764	0.0718815		0.0528848	0.0614378					0.0111987	0.0508357	0.00684348	0.0193911			0.0458934	0.0188365	0.212526	0.0508795		0.00446534	0.0493578			0.0473705	0.0123443	0.0708821	0.00798997	0.0373075	0.0186635		0.0712914
1982	0.0876973	0.0565552	0.0470327		0.0971681	0.0526201	0.0442917	0.10084		0.0950794	0.0240433	0.0501696	0.0274567	0.00297572	0.0437023	0.0605418		0.0564899	0.0487395					0.0104947	0.0465831	0.00698731	0.0196166			0.0498129	0.0171517	0.319496	0.0485787		0.00320061	0.0411451			0.04474	0.0113319	0.081832	0.00763568	0.0341208	0.015894		0.0642873
1983	0.0762058	0.047984	0.0408469		0.0902114	0.0462345	0.0380514	0.0897897		0.0865861	0.0234883	0.0422695	0.0224797	0.000605238	0.0395998	0.051334		0.0447558	0.0387468					0.0101021	0.0374335	0.00570313	0.0213849			0.0483914	0.0189919	0.294191	0.051032		0.00186365	0.0375791			0.0387782	0.0118399	0.0919184	0.00768997	0.0348686	0.0450301		0.056945
1984	0.0725009	0.0402066	0.0402157		0.0856359	0.0445574	0.0365522	0.0831566		0.0811719	0.0233403	0.0402269	0.0210002	0.000151403	0.0376862	0.0476768		0.0406548	0.0359858					0.00918425	0.0311847	0.00466596	0.0194236			0.050016	0.0188749	0.260568	0.0564099		0.00357795	0.0316337			0.0358325	0.0152852	0.086597	0.0067931	0.0304429	0.043814		0.0538434
1985	0.0640075	0.0404899	0.0375997		0.0745023	0.0395938	0.0334378	0.0797732		0.0699872	0.0240254	0.0399329	0.0218003	0.00122367	0.0361516	0.0482923		0.0350498	0.0280612					0.0333907	0.0295963	0.00479925	0.0186778			0.0591649	0.0200842	0.303039	0.0902464		0.00428611	0.0257883			0.0340297	0.0274129	0.100939	0.00508608	0.0288688	0.0399275		0.0494561
1986	0.0448742	0.0327887	0.0243277		0.0549754	0.0351583	0.0230777	0.0858297		0.0533139	0.0292858	0.0379033	0.0175424	0.0038332	0.0329734	0.0443678		0.0235646	0.0189491					0.0402803	0.0171949	0.00495166	0.017905				0.0227898				0.00436709	0.0266707			0.0252381			0.00661992	0.0303779	0.0269853		0.0389949
1987	0.0455409	0.0352048	0.0294617		0.0558976	0.0357996	0.0256769	0.0951528		0.0558461	0.0313913	0.0394423	0.0176352	0.00316947	0.0394934	0.0466549		0.0261195	0.0230514					0.0482157	0.0236392	0.00440753	0.020735				0.025938				0.00442237	0.0303426			0.0281717			0.00783023	0.0326998	0.0329191		0.0411644
1988	0.0404822	0.0330808	0.0299416		0.0456311	0.0338388	0.023441	0.0882325		0.0524256	0.0284743	0.038974	0.0164427	0.00270366	0.0391341	0.0454466		0.0248668	0.018643	0.0417386				0.0403798	0.0197716	0.00344756	0.0206997	0.00194417		0.0388639	0.0247707	0.169913	0.0615262		0.00582143	0.0321481			0.0281359	0.0187229	0.0604562	0.00839143	0.0307966	0.0312382		0.0392619
1989	0.0419401	0.0314905	0.0281663		0.0464811	0.0311018	0.0239244	0.079226		0.0548913	0.0250955	0.0343261	0.0163159	0.00393401	0.0390274	0.0426503		0.0262819	0.0208751	0.0441198				0.0323705	0.0216341	0.00296381	0.016845	0.00288352		0.0436029	0.0259188	0.184535	0.0670119		0.00802482	0.0315463			0.0203507	0.0250638	0.067645	0.0078224	0.0273631	0.0311745		0.038468
1990	0.0436772	0.0356458	0.0333548	0.0788539	0.0525359	0.0328705	0.0280723	0.0777674		0.0646711	0.029649	0.0379789	0.0209486	0.00428764	0.0460632	0.0507897	0.049456	0.0290949	0.0217552	0.0741872	0.054414	0.029649	0.0302663	0.0285601	0.027349	0.0278473	0.0560526	0.0714256	0.091866	0.0713305	0.0227603	0.0679605	0.0787414	0.0403844	0.0360407	0.038792	0.0486181		0.0270477	0.0416273	0.0811721	0.0340874	0.0330278	0.0369722	0.115213	0.0474479
1991	0.0394099	0.0349652	0.0309434	0.0653213	0.0486683	0.0322681	0.0284047	0.0627938		0.0633818	0.0292624	0.0372783	0.0218877	-0.000814309	0.04462	0.0533969	0.0358846	0.0299421	0.0204617	0.0591899	0.0434382	0.0253626	0.0254817	0.0316684	0.0219438	0.0236006	0.032566	0.0560468	0.0733207	0.0944028	0.0200459	0.0215183	0.063612	0.0302922	0.0323401	0.0369452	0.040369		0.0258074	0.0307246	0.0598362	0.0315879	0.0322564	0.0322312	0.0890294	0.0424711
1992	0.0370086	0.0345573	0.0291917	0.061809	0.0431511	0.032216	0.0285506	0.0598991		0.0602384	0.0391957	0.0368035	0.0199997	0.0151567	0.0283088	0.0498218	0.032329	0.0205774	0.0188317	0.0592632	0.123537	0.0220804	0.0224593	0.0478035	0.0200333	0.022556	0.0426993	0.053573	0.0687078	0.122031	0.0176283	0.0810002	0.0623264	0.0274142	0.0313881	0.0339324	0.0344567		0.020507	0.0305416	0.0637793	0.0303684	0.0322365	0.0330636	0.0738239	0.0429668
1993	0.0348297	0.029037	0.0248369	0.0570113	0.0390131	0.0354362	0.022987	0.0532567		0.0523921	0.0361415	0.0349572	0.0160527	0.0151215	0.0235895	0.0349022	0.0263345	0.0181848	0.0156428	0.0483969	0.107806	0.0196491	0.0203437	0.0403017	0.0169793	0.019947	0.0468151	0.0485217	0.0661523	0.193465	0.0163546	0.0712493	0.0552921	0.0252758	0.0287173	0.0320114	0.0284139	0.000873854	0.0212315	0.0243351	0.0545159	0.0265036	0.0291698	0.0317327	0.0641413	0.0396827
1994	0.0324185	0.0268552	0.0243585	0.0601685	0.0369381	0.0352754	0.0224754	0.0492382		0.0491273	0.0341849	0.032392	0.0153288	0.0186843	0.0218294	0.0341655	0.0223465	0.0172691	0.0150868	0.055651	0.0574293	0.0168981	0.0167874	0.039566	0.0171068	0.0144326	0.0454545	0.0426514	0.0721987	0.211402	0.0121694	0.108148	0.0565074	0.0250986	0.0247168	0.0356649	0.0166447	0.00093846	0.0227271	0.02682	0.0533037	0.0254819	0.0310342	0.0273832	0.0633583	0.0366517
1995	0.0322316	0.0267317	0.0249489	0.0493102	0.0420269	0.039091	0.0236076	0.0462066		0.04667	0.0368019	0.0358123	0.0147066	0.0180866	0.0218089	0.036367	0.0232046	0.0179714	0.015115	0.0453331	0.0624152	0.0199007	0.0173996	0.0425292	0.0200202	0.0133468	0.0424714	0.0414348	0.0762271	0.230075	0.037971	0.119339	0.0706447	0.0288788	0.0239379	0.040974	0.0195158	0.000942927	0.0243446	0.0265397	0.0556529	0.0288698	0.0354883	0.0308696	0.0650039	0.037547
1996	0.0357036	0.028039	0.0285945	0.0585263	0.0465415	0.0357646	0.025776	0.0361265		0.0502522	0.0387532	0.0370231	0.0116269	0.0224048	0.0178323	0.0432706	0.0276995	0.0196512	0.0197326	0.0503711	0.0559528	0.0234315	0.0222075	0.0320018	0.0252208	0.0135366	0.0453933	0.0456019	0.0886684	0.251462	0.0437503	0.132248	0.0809046	0.0343828	0.0271193	0.0430365	0.0266899	0.00215688	0.0300762	0.0320515	0.0699456	0.0281338	0.0349558	0.0348931	0.0759705	0.0385565
1997	0.0327101	0.025322	0.024112	0.0518556	0.0386689	0.0349596	0.0228565	0.0312215		0.0467399	0.0323158	0.0322469	0.0113366	0.0158504	0.0140182	0.0354339	0.0253219	0.0184672	0.0177326	0.0481483	0.0534167	0.0214362	0.0200014	0.0292764	0.0226007	0.0133226	0.0478682	0.0405695	0.0825709	0.227991	0.0449917	0.134238	0.0777258	0.0295591	0.0255103	0.0407292	0.0214225	0.00217102	0.0259114	0.0219383	0.0583005	0.0306624	0.0299597	0.0311104	0.0679935	0.0354971
1998	0.0258666	0.0215743	0.0198655	0.032821	0.0288694	0.027095	0.0193782	0.025674		0.0362556	0.0278888	0.0296973	0.0105763	0.00874057	0.0101797	0.00549826	0.0173065	0.00952726	0.0116306	0.0461291	0.0389253	0.0156018	0.0129506	0.030805	0.0156609	0.00859377	0.0376772	0.0287567	0.0524473	0.0842952	0.0321624	0.0822303	0.0464833	0.0181243	0.0181389	0.0300346	0.00977981	0.00135538	0.0202447	0.0140787	0.0374642	0.0222457	0.0276437	0.0252383	0.0461259	0.0278777
1999	0.027419	0.0218443	0.0209786	0.0457585	0.0300274	0.0299914	0.0176045	0.0247657		0.0393614	0.0275269	0.0253748	0.0104595	0.0123251	0.0117342	0.0072968	0.025261	0.0109669	0.0140803	0.0161687	0.0391739	0.0229852	0.0189594	0.0279113	0.0181723	0.0109154	0.0421229	0.0397741	0.0766177	0.0732077	0.038659	0.125815	0.0717643	0.0236516	0.0229974	0.0300938	0.0162733	0.000861117	0.0188308	0.0183189	0.0521118	0.0246528	0.0257253	0.0273444	0.0686481	0.0292955
2000	0.0361779	0.0226293	0.0259505	0.0754352	0.042497	0.0344173	0.0148265	0.0265444		0.04743	0.0287758	0.0232978	0.0139228	0.0163246	0.021004	0.00832216	0.038987	0.0159115	0.0221753	0.0246511	0.0505855	0.0331168	0.0278878	0.0393621	0.0276048	0.0162882	0.0614916	0.0637052	0.110956	0.135644	0.0396542	0.150778	0.100653	0.0451029	0.0324406	0.0319936	0.0133147	0.000906033	0.025539	0.0232425	0.0764852	0.0305964	0.0228753	0.0324882	0.101669	0.0362311
2001	0.0332465	0.0207095	0.0237258	0.0726449	0.0382462	0.0294174	0.0130415	0.025463		0.0450285	0.0274644	0.0183859	0.0127106	0.0127511	0.0232793	0.00630741	0.0338096	0.0120275	0.0211682	0.0208787	0.0414485	0.0309486	0.0236517	0.0428716	0.0220059	0.0132086	0.0460889	0.0490999	0.0857294	0.127886	0.0336439	0.11544	0.0899597	0.0395854	0.0296009	0.0272649	0.0242693	0.00104104	0.0241188	0.0179475	0.062622	0.0292862	0.0236971	0.0296473	0.0838006	0.0328177
2002	0.0310827	0.0199766	0.023356	0.075018	0.0366307	0.026875	0.0133632	0.0261564		0.043668	0.0271397	0.0190399	0.0124847	0.0148281	0.0241771	0.00683209	0.0354576	0.0126561	0.0231746	0.020365	0.040823	0.0312864	0.0224456	0.0441315	0.0218752	0.0139721	0.0476133	0.0480507	0.0802288		0.0324694			0.0372469	0.0283441	0.0295961	0.023097	0.00148975	0.0234448			0.0240696	0.0232254	0.0340431	0.0870299	0.0310803
2003	0.0357627	0.0211362	0.0283796	0.083184	0.0448229	0.0266071	0.0154371	0.033392		0.0552858	0.0328152	0.0238067	0.0151271	0.0174003	0.034648	0.00846213	0.0383574	0.0145092	0.0259648	0.0229291	0.043845	0.0368326	0.025483	0.0444001	0.024408	0.0155907	0.0520118	0.0534822	0.0882027	0.257779	0.0355576	0.13228	0.0853088	0.0443081	0.0342703	0.0348698	0.0134326	0.00185925	0.0334036	0.0314356	0.0680785	0.0320658	0.0262443	0.0373756	0.0874625	0.0364915
2004	0.0403319	0.0253849	0.0329142	0.102039	0.0436228	0.0300472	0.0316674	0.0381508		0.0607837	0.0370957	0.038057	0.01834	0.0212962	0.0341596	0.00940505	0.0464462	0.0167266	0.0309283	0.0295492	0.0602282	0.0501398	0.0313391	0.0499205	0.0294837	0.0204964	0.0587207	0.0601833	0.104442	0.205068	0.0527177	0.146334	0.0994202	0.0510664	0.0463885	0.0462421	0.0133752	0.00331271	0.0364518	0.0357165	0.0843736	0.0375129	0.0288055	0.0415872	0.123374	0.0433418
2005	0.0486751	0.031168	0.0407121	0.132245	0.0569558	0.0341679	0.0370377	0.0440828		0.0715988	0.0413786	0.0420963	0.0234013	0.0272613	0.0390893	0.0134335	0.0586563	0.0190706	0.0379536	0.0395621	0.0487504	0.0669784	0.0398544	0.0608279	0.0394427	0.0312098	0.0755198	0.0748542	0.146772	0.265337	0.0641401	0.197674	0.124598	0.0659224	0.0633333	0.0499795	0.0331011	0.00422634	0.0435793	0.0472579	0.118276	0.0516054	0.0314446	0.0496356	0.140608	0.0513932
2006	0.0504471	0.0365562	0.0460318	0.147479	0.0622447	0.0354881	0.0424297	0.0483369		0.0754586	0.0437511	0.0440998	0.0198455	0.0332023	0.0452473	0.0146339	0.0650275	0.0201671	0.0431846	0.0445528	0.0534598	0.0694399	0.0454551	0.0677524	0.0383577	0.0369007	0.0843632	0.0833613	0.166258	0.32061	0.0723444	0.226535	0.136461	0.0736978	0.0664922	0.0530124	0.0221021	0.00408058	0.0486566	0.0478959	0.13755	0.0303905	0.0318419	0.0576937	0.155059	0.0554076
2007	0.0521304	0.0364388	0.0472908	0.153581	0.0661188	0.0352445	0.0436108	0.0483942		0.0755456	0.0486063	0.0475721	0.0227577	0.0335349	0.0424583	0.049873	0.0688272	0.0219569	0.0458408	0.0454441	0.0533623	0.0720075	0.0458948	0.0677879	0.041609	0.0420252	0.088558	0.0847795	0.169591	0.327708	0.077126	0.244735	0.138837	0.0800248	0.0686036	0.0573656	0.0110326	0.00444698	0.0524209	0.0407456	0.143123	0.0314533	0.0289631	0.0700111	0.142009	0.0575159
2008	0.0649552	0.0457803	0.0606786	0.197689	0.0858695	0.0446262	0.0565289	0.0635201		0.0946014	0.0611089	0.0576248	0.0308283	0.042499	0.0488443	0.0615459	0.0805484	0.0277364	0.062228	0.0572302	0.0665188	0.0899256	0.0590643	0.0920465	0.0585823	0.0525498	0.113473	0.105207	0.228753	0.438024	0.0908526	0.302749	0.19313	0.103313	0.0880836	0.0686355	0.0244608	0.0416169	0.0676048	0.0437963	0.195603	0.0440063	0.0380221	0.0904218	0.212458	0.073254
2009	0.0439442	0.0339841	0.0441953	0.14804	0.0646864	0.0371633	0.045806	0.0506163		0.0612851	0.0478421	0.0322223	0.0299084	0.0291051	0.0457624	0.0507467	0.0477143	0.0164	0.0367714	0.0365945	0.041518	0.0609401	0.0343723	0.074466	0.0383109	0.0326724	0.0827789	0.0744889	0.149104	0.263457	0.063438	0.206093	0.133485	0.0668158	0.0534554	0.0525981	0.00693669	0.025955	0.0504135	0.0262332	0.133857	0.0260949	0.0321226	0.0688135	0.141198	0.0526282
2010	0.0496553	0.03699	0.0378959	0.185761	0.0721424	0.0414084	0.0510613	0.0513283		0.0696362	0.0536763	0.0356443	0.0283276	0.0318359	0.0557106	0.0578565	0.0554107	0.0201322	0.0485227	0.0434354	0.0540839	0.0591233	0.0422888	0.081309	0.0486147	0.0437212	0.0867591	0.0708922	0.184209	0.374555	0.0550882	0.25858	0.179034	0.0676028	0.0658535	0.0611834	0.0157155	0.0330653	0.0626011	0.0604101	0.167207	0.0235903	0.0336762	0.0774618	0.171568	0.0594153

## Sheet: FractionGDPonEnergyCountryEst
Year	United States	United Kingdom	Spain	Russia	Netherlands	Japan	Italy	Germany		Canada	France	Austria	Denmark	Finland	Norway	Sweden	Argentina	Australia	Belgium	Brazil	China	Chinese Taipei	Columbia	Czech Republic	Greece	Hungary	India	Indonesia	Iran	Iraq	Korea	Kuwait	Libya	Malaysia	Mexico	New Zealand	Nigeria	Poland	Portugal	Qatar	Saudi Arabia	Soth Africa	Switzerland	Turkey	Venezuela	World
1978	0.0658273	0.0439568	0.0318089	0.182595	0.0559804	0.0472951	0.032675	0.100685		0.0723817	0.042534	0.0514493	0.0360444	0.0414007	0.0374396	0.0631035	0.0768973	0.0399974	0.0592275	0.049052	0.305617	0.079776	0.0516828	0.0604233	0.0441268	0.06596	0.0569437	0.0506888	0.0714594	0.0141531	0.0489649	0.0349015	0.0232442	0.0689179	0.0312621	0.0420841	0.0379373	0.0967091	0.0254817	0.00912182	0.0364793	0.036738	0.0367681	0.0470189	0.051314	0.0658297
1979	0.10374	0.0712537	0.0587358	0.301293	0.104175	0.0723635	0.0580447	0.122667		0.117888	0.0719808	0.0708787	0.0521868	0.0808821	0.0545075	0.0952633	0.133185	0.0664198	0.100374	0.0822226	0.445337	0.134524	0.0884046	0.0965799	0.0725664	0.104259	0.108977	0.112776	0.189476	0.026931	0.101216	0.112625	0.0457156	0.12982	0.0599472	0.0586365	0.0618757	0.153896	0.0499749	0.017888	0.0812383	0.0568505	0.0454877	0.0565459	0.172645	0.103414
1980	0.0989487	0.0687603	0.0582276	0.334217	0.0879491	0.0683326	0.0531057	0.124953		0.104753	0.0701609	0.0748832	0.0540703	0.0767972	0.0551429	0.0930485	0.136683	0.0639197	0.0820529	0.0833382	0.424322	0.152489	0.100223	0.095015	0.065157	0.10654	0.113551	0.124398	0.211351	0.0314557	0.107027	0.146137	0.0555436	0.145708	0.066985	0.0627792	0.0796276	0.13372	0.0507417	0.0201432	0.0893513	0.0605566	0.0471318	0.0618602	0.168281	0.102613
1981	0.0958244	0.0646523	0.0563638	0.308398	0.0878339	0.0639135	0.0511704	0.111479		0.102431	0.0615533	0.0649812	0.0467178	0.0719023	0.0500427	0.0802059	0.12586	0.0632707	0.071346	0.0763734	0.356311	0.119306	0.0910232	0.101048	0.0506424	0.0977414	0.106325	0.116558	0.18373	0.0484258	0.100593	0.141164	0.0739435	0.139412	0.0601719	0.057489	0.0832223	0.132984	0.0495643	0.024492	0.0840435	0.0549587	0.0423229	0.0618102	0.131507	0.0958201
1982	0.0877873	0.0572652	0.0479574	0.256524	0.0797214	0.0532951	0.0456365	0.1021		0.094278	0.0521737	0.0540294	0.0423024	0.0566098	0.0466305	0.0657113	0.119226	0.0643235	0.0685865	0.0700407	0.298304	0.0961552	0.0805346	0.0859936	0.0475924	0.0858288	0.0992191	0.102798	0.156447	0.0529991	0.085148	0.163645	0.0618594	0.120797	0.052662	0.0514648	0.0813924	0.146396	0.0479871	0.0270758	0.0888482	0.0470687	0.0378146	0.0558405	0.109951	0.0853647
1983	0.0762805	0.0476679	0.0403578	0.2035	0.0701856	0.0471349	0.0389095	0.0916259		0.0853088	0.0459216	0.0455046	0.031437	0.0494326	0.0410324	0.0516922	0.107495	0.0509356	0.0602753	0.0648061	0.251715	0.0883672	0.0658362	0.0738591	0.0404683	0.0727766	0.0904852	0.0844203	0.128104	0.0363246	0.0718664	0.134451	0.069709	0.108078	0.0442299	0.04919	0.0775302	0.12159	0.0443848	0.0279773	0.0908701	0.04174	0.0372657	0.0471428	0.103839	0.0738438
1984	0.0725645	0.0441917	0.0388558	0.201537	0.0613184	0.0455984	0.0372396	0.0850616		0.0802926	0.0435886	0.0432102	0.0275796	0.043753	0.0385684	0.0468998	0.104517	0.0464613	0.0544581	0.0616111	0.206546	0.0754019	0.0644008	0.068936	0.0341946	0.0679391	0.0860576	0.0758277	0.140721	0.0336577	0.0661066	0.113521	0.0710055	0.101262	0.0471539	0.042738	0.0672463	0.108442	0.0426849	0.0343186	0.0787369	0.0366625	0.0335097	0.0430007	0.0925288	0.0698384
1985	0.0640627	0.0407118	0.0361273	0.194697	0.0575221	0.0406365	0.0337822	0.0818167		0.0723739	0.0414519	0.0411826	0.0308952	0.0451516	0.0375914	0.0497535	0.0989991	0.0405678	0.0525992	0.0571645	0.182245	0.0669189	0.0619608	0.0674276	0.0349713	0.0682691	0.0847419	0.0747632	0.135782	0.0411713	0.0604238	0.133866	0.068996	0.10016	0.0440348	0.0344831	0.0576602	0.104905	0.0379644	0.0367977	0.0805176	0.030388	0.030995	0.0391835	0.0901188	0.0644406
1986	0.0449367	0.0328224	0.0254048	0.13525	0.0427882	0.0358868	0.0227502	0.085588		0.0560933	0.0379406	0.0385038	0.0227161	0.0340228	0.0368017	0.0450007	0.0690488	0.0275766	0.0449814	0.045772	0.142842	0.0403491	0.0505814	0.0553868	0.0195208	0.0550624	0.0589468	0.0449787	0.0873126	0.0278006	0.0454166	0.0597434	0.0349407	0.0633504	0.0256322	0.0287202	0.0337323	0.104523	0.0277925	0.0313876	0.0379914	0.0217845	0.0308825	0.0267774	0.0502162	0.0500598
1987	0.0455955	0.0344705	0.0306988	0.151705	0.0397071	0.0374081	0.0262288	0.095018		0.0590408	0.0413365	0.0403302	0.0234895	0.0388109	0.0399261	0.0476798	0.0793223	0.0299727	0.048049	0.0505231	0.149579	0.0443426	0.0485617	0.067009	0.0254812	0.0611972	0.0670816	0.0543807	0.103028	0.0347977	0.0500825	0.0965423	0.0610344	0.0703447	0.0317571	0.0345388	0.0408668	0.123893	0.0298964	0.0318827	0.0499161	0.0271102	0.0334792	0.0322936	0.0707159	0.0539566
1988	0.0405309	0.0327372	0.0304268	0.143814	0.0338238	0.0353968	0.0233945	0.0883729		0.0557092	0.0363473	0.0388284	0.0212934	0.0348939	0.0400135	0.0464909	0.0723634	0.0287921	0.0430288	0.0551781	0.129729	0.0435351	0.0502622	0.0562565	0.023378	0.0537046	0.0616032	0.0449456	0.0981416	0.0355133	0.0475043	0.0889118	0.0316745	0.0610304	0.0273303	0.0364572	0.0312982	0.111006	0.0280139	0.0314862	0.0396702	0.025232	0.0321556	0.0289395	0.0525811	0.0494775
1989	0.0419784	0.0307793	0.0288304	0.150871	0.0348046	0.0326937	0.0245334	0.0792849		0.0585582	0.0341515	0.0343212	0.0189631	0.0330958	0.0387513	0.044661	0.0774087	0.030243	0.0407146	0.0602572	0.125785	0.0456467	0.0502221	0.0500743	0.0257788	0.0476886	0.0643449	0.0489972	0.11432	0.0382405	0.0505702	0.105336	0.0417981	0.0641085	0.0334089	0.03557	0.0379622	0.0904831	0.023264	0.033496	0.0435078	0.0253526	0.0292499	0.0305359	0.0604541	0.0490889
1990	0.0437191	0.0353197	0.0338876	0.13277	0.0403281	0.0341454	0.0287234	0.07756		0.0648258	0.0402351	0.0380805	0.0229445	0.0365912	0.0393184	0.0540906	0.0925385	0.0354282	0.0451925	0.0727027	0.169814	0.0557053	0.0542697	0.0478827	0.0325709	0.0504162	0.0779437	0.0648707	0.121887	0.070863	0.0551721	0.0517006	0.0441781	0.0729923	0.0377146	0.0429069	0.0427534	0.082434	0.0284401	0.0321187	0.0446485	0.0340831	0.0344153	0.0366514	0.0723929	0.0511652
1991	0.0394743	0.0346179	0.0319082	0.127458	0.0373301	0.0328867	0.0289768	0.061888		0.0630314	0.0383395	0.0368457	0.0237746	0.0348352	0.0404948	0.0558079	0.0749508	0.0328908	0.0435335	0.0587068	0.122274	0.0457906	0.0488311	0.0463111	0.0270849	0.0504716	0.0824254	0.0508735	0.105694	0.104709	0.0502936	0.0164489	0.0391176	0.0652949	0.0329593	0.0413301	0.0376582	0.0949503	0.0269693	0.0308972	0.0443364	0.0315332	0.0326819	0.0307733	0.0519539	0.0463147
1992	0.0370365	0.0339211	0.0303819	0.130201	0.0448928	0.0325513	0.0283351	0.0592334		0.0599947	0.0386482	0.0364121	0.0206746	0.0466982	0.0520312	0.0537695	0.0699563	0.0288402	0.0423927	0.058947	0.176375	0.0513803	0.0461746	0.0496632	0.0252318	0.0488925	0.0741473	0.0477537	0.0966419	0.12886	0.0500738	0.0267599	0.0343618	0.0575412	0.030985	0.0388381	0.0376321	0.0886678	0.0224537	0.0258023	0.0429689	0.0303676	0.0333301	0.0323466	0.0566088	0.0461651
1993	0.0348591	0.0278729	0.0254821	0.086644	0.0390916	0.0354458	0.0229915	0.05288		0.0534581	0.0358938	0.0347453	0.0179429	0.0440735	0.0487738	0.0391657	0.0619421	0.0256823	0.0383462	0.0493136	0.154848	0.0457724	0.0485745	0.0424521	0.0229343	0.0471325	0.0547258	0.046365	0.082066	0.193912	0.047879	0.0259092	0.0308119	0.0486214	0.0278528	0.0360082	0.0298699	0.0868955	0.0224494	0.0102673	0.0338861	0.0230274	0.0308397	0.0324395	0.0437175	0.0417304
1994	0.0324408	0.0259025	0.0251228	0.0931183	0.0387509	0.0353186	0.0223987	0.0488121		0.0503931	0.033751	0.032241	0.0175748	0.0421607	0.0426544	0.0376807	0.0627948	0.0244041	0.0363627	0.0558925	0.0809834	0.0353843	0.0454422	0.0416058	0.0219061	0.0465844	0.05509	0.0414504	0.0850619	0.197693	0.0462203	0.0338909	0.0367435	0.0515698	0.0250353	0.0384698	0.0234775	0.0811371	0.0224726	0.0271982	0.0398559	0.0219994	0.0316611	0.0275433	0.0515301	0.0383517
1995	0.0322543	0.0256379	0.026675	0.126763	0.0420897	0.0390547	0.0235498	0.0519176		0.0478266	0.0363932	0.0360238	0.0178119	0.0453574	0.0463884	0.0405154	0.0683263	0.0248477	0.0388525	0.0466181	0.0829953	0.0364478	0.0445621	0.0440892	0.0243494	0.0489972	0.0552867	0.043414	0.0920577	0.212624	0.0513058	0.0403514	0.0527385	0.0526191	0.024644	0.0426837	0.0224249	0.0839678	0.0229256	0.0317216	0.0408304	0.0252684	0.0361082	0.0307616	0.0559555	0.0402416
1996	0.0357321	0.0263134	0.0299686	0.0869386	0.037668	0.0358252	0.0268103	0.0372919		0.0505136	0.0381136	0.0371893	0.0238325	0.0457003	0.0461776	0.0466022	0.0747884	0.0261416	0.0429635	0.0525603	0.0749088	0.0385866	0.046865	0.0467671	0.0288644	0.0511572	0.0600098	0.04641	0.101977	0.23764	0.0564596	0.0506304	0.0556109	0.0600036	0.0284143	0.0445741	0.0270491	0.0825703	0.0290161	0.0386326	0.0487215	0.0252567	0.0362173	0.0353843	0.0552263	0.0400345
1997	0.0327456	0.0234672	0.0255239	0.0694435	0.0307567	0.0347805	0.0239488	0.0321835		0.0475476	0.031679	0.0330616	0.0192378	0.0385669	0.0383883	0.0334936	0.0678574	0.0246739	0.0365343	0.0498221	0.0767305	0.0379771	0.0425249	0.0424956	0.0262106	0.0455605	0.0620122	0.0467482	0.0850254	0.2066	0.05592	0.0368573	0.0497271	0.0488531	0.0271358	0.0428376	0.0251975	0.0650365	0.0241353	0.0146304	0.0343852	0.0204742	0.0307769	0.0316324	0.0376814	0.0364473
1998	0.0258869	0.0204138	0.0206033	0.0599642	0.02338	0.031111	0.0204778	0.0265262		0.0376519	0.0273906	0.029869	0.0162909	0.0344578	0.0370241	0.0393139	0.0541887	0.0177401	0.0306072	0.0468649	0.0652127	0.0321777	0.0346642	0.0395296	0.0193266	0.0412924	0.047714	0.0316247	0.0581785	0.0744853	0.0405314	0.0213713	0.0360687	0.0345876	0.0194261	0.0320502	0.019743	0.0511326	0.0192536	0.0131864	0.0220306	0.0197854	0.0279952	0.0259801	0.0257554	0.0299876
1999	0.0274382	0.0209039	0.0216001	0.0720778	0.0244828	0.0347652	0.021155	0.0255363		0.040347	0.0270254	0.0257411	0.0154702	0.0340466	0.0363019	0.0375028	0.0611631	0.0194108	0.0314063	0.0498418	0.063745	0.0347724	0.0377233	0.039069	0.0208492	0.0412427	0.0521561	0.0481785	0.0715332	0.0663083	0.0515499	0.0533175	0.0542438	0.0460586	0.0244853	0.0322843	0.0250748	0.0486394	0.0189433	0.0190434	0.0383529	0.0210138	0.0271382	0.0278383	0.0443175	0.0320472
2000	0.0361906	0.0215593	0.0264003	0.0713973	0.0357807	0.0399469	0.0224584	0.0275358		0.0460271	0.0280737	0.0261413	0.0183703	0.0248887	0.0221093	0.0357101	0.081265	0.0258692	0.036949	0.0580719	0.0748752	0.0459328	0.0454905	0.0426173	0.0304037	0.0456268	0.0652962	0.0715323	0.105096	0.122084	0.0667685	0.0721664	0.081866	0.0615461	0.0349348	0.0341665	0.042759	0.0464708	0.0268743	0.0176131	0.0568049	0.0237429	0.0254569	0.0334787	0.0572193	0.0384635
2001	0.0332574	0.0200815	0.0243858	0.0646235	0.0328026	0.0341572	0.0207229	0.0271065		0.0434661	0.0267905	0.0259358	0.0184635	0.0232989	0.0242092	0.0364917	0.0741131	0.0225144	0.0360326	0.0494495	0.0633242	0.0376545	0.0407743	0.0424184	0.0253	0.0435046	0.051692	0.066365	0.089308	0.114779	0.057496	0.0619622	0.0722473	0.0559776	0.0313084	0.0300561	0.0387195	0.0451374	0.0246388	0.0178757	0.0473875	0.0219003	0.0256589	0.0293753	0.0522744	0.0348438
2002	0.0310827	0.0189889	0.0239072	0.057597	0.0342833	0.031064	0.0209042	0.0277858		0.0419697	0.0265764	0.0264447	0.0185785	0.025245	0.0260159	0.0387302	0.0752699	0.0231496	0.0395541	0.0486255	0.0644187	0.0369268	0.0393414	0.0437588	0.0249505	0.048008	0.0525509	0.0664651	0.0861761	0.131698	0.0546148	0.0731054	0.0769751	0.0537856	0.0286045	0.0317686	0.0373991	0.045898	0.0229142	0.0171923	0.0546206	0.0190366	0.0248198	0.0334889	0.0610329	0.0339969
2003	0.0357627	0.0204061	0.0291685	0.0626233	0.0399865	0.0318271	0.0265468	0.034722		0.0534856	0.0316026	0.0330053	0.0237026	0.0318523	0.0352295	0.0487563	0.0879216	0.0259546	0.0465474	0.0550406	0.073263	0.037602	0.0447175	0.0676772	0.0280316	0.0549326	0.0564623	0.0738984	0.0969693	0.232208	0.0601044	0.0735636	0.0791479	0.0616204	0.0348456	0.0378373	0.0457486	0.0532145	0.031073	0.0201563	0.0568922	0.026071	0.0283001	0.0360272	0.0738693	0.0392735
2004	0.0403319	0.0239285	0.0340703	0.0885337	0.0430348	0.0353287	0.0331833	0.0404646		0.0583489	0.0354298	0.042525	0.0270848	0.0348479	0.0350763	0.048452	0.109755	0.0284584	0.0524093	0.0627461	0.0962824	0.0470285	0.0532289	0.0850983	0.0335478	0.0615215	0.0698404	0.0914835	0.133815	0.226383	0.0550876	0.0939427	0.0995216	0.0801683	0.0469038	0.0479055	0.0460833	0.0614073	0.0342265	0.0327478	0.0789789	0.0340146	0.0308199	0.0397489	0.0802429	0.0461359
2005	0.0486751	0.0296036	0.042482	0.115746	0.0555685	0.039024	0.0380101	0.0465482		0.0685256	0.0396347	0.0481649	0.0321689	0.0423954	0.0394869	0.0505869	0.133393	0.034013	0.0600843	0.0753231	0.114804	0.0585066	0.0625353	0.0934072	0.0445053	0.0814782	0.0828592	0.115019	0.22768	0.305264	0.0657998	0.132498	0.124568	0.100934	0.0642515	0.0527776	0.0626171	0.0702377	0.0411423	0.0496862	0.108578	0.0427807	0.0341488	0.0469741	0.0833094	0.0558323
2006	0.0504471	0.0351458	0.0480425	0.126891	0.0625741	0.0405704	0.0437027	0.0507726		0.0714305	0.0420734	0.0515965	0.0337221	0.0484874	0.0441818	0.0530319	0.134537	0.0347702	0.0658907	0.0812066	0.117901	0.0635869	0.0672959	0.096755	0.0503638	0.0925766	0.0926346	0.114866	0.266912	0.269932	0.075701	0.156979	0.133387	0.107977	0.0670422	0.055884	0.052295	0.0700334	0.0443729	0.0502921	0.130366	0.0550048	0.034326	0.0537483	0.11717	0.0602557
2007	0.0521304	0.0348928	0.0498743	0.127529	0.057722	0.0402712	0.0446563	0.0511356		0.0715807	0.0470258	0.0546729	0.0356797	0.0459724	0.0406112	0.0504223	0.136272	0.0382415	0.0733015	0.0838019	0.127624	0.0628094	0.0707749	0.0946251	0.0512351	0.0964147	0.0939913	0.120651	0.279747	0.304687	0.0793127	0.171684	0.137611	0.120069	0.0698175	0.0607599	0.0489548	0.0744094	0.0484304	0.0468264	0.141448	0.0669019	0.0321328	0.0628989	0.127145	0.0631894
2008	0.0649552	0.0426751	0.0653721	0.163054	0.0790693	0.0491446	0.0578292	0.0679497		0.0916271	0.0585499	0.0670612	0.0473056	0.0615005	0.0479402	0.0606493	0.16301	0.0468049	0.0956085	0.101709	0.172636	0.0781271	0.0870866	0.122739	0.069551	0.12815	0.112807	0.149346	0.333133	0.446903	0.0927763	0.216402	0.188429	0.147018	0.0917114	0.0710087	0.0594035	0.0890388	0.0642656	0.0581845	0.195583	0.0801448	0.0406217	0.0799798	0.186686	0.0811734
2009	0.0439442	0.0319451	0.0466136	0.127351	0.0595152	0.0436464	0.0470407	0.0536851		0.0587945	0.0467911	0.0524725	0.0336764	0.0464581	0.0447286	0.0504514	0.107261	0.0290419	0.0675615	0.076636	0.121474	0.0536443	0.0618913	0.103013	0.0456931	0.105329	0.0816267	0.0997612	0.239305	0.353318	0.0654539	0.159518	0.132456	0.105254	0.0562367	0.054112	0.0368122	0.068034	0.0477553	0.042964	0.133617	0.0592755	0.0333471	0.0613214	0.134128	0.0599578
2010	0.0496553	0.0344768	0.0558142	0.149819	0.0604218	0.0483733	0.0510204	0.0549662		0.0680164	0.0528063	0.0545906	0.0401061	0.0532145	0.0563279	0.0584365	0.114506	0.0334867	0.0813797	0.0878262	0.128291	0.0592179	0.0672473	0.105712	0.0553093	0.115654	0.108181	0.117941	0.289138	0.530765	0.0864895	0.20901	0.169085	0.126412	0.0694171	0.0628856	0.0463878	0.0762879	0.059069	0.0695879	0.17767	0.0652577	0.0357709	0.0663003	0.187172	0.0685158

## Sheet: EIRp_Elec_Res
Year	United States	United Kingdom	Spain	Russia	Netherlands	Japan	Italy	Germany		Canada	France	Austria	Denmark	Finland	Norway	Sweden	Argentina	Australia	Belgium	Brazil	China	Chinese Taipei	Columbia	Czech Republic	Greece	Hungary	India	Indonesia	Iran	Iraq	Korea	Kuwait	Libya	Malaysia	Mexico	New Zealand	Nigeria	Poland	Portugal	Qatar	Saudi Arabia	Soth Africa	Switzerland	Turkey	Venezuela	World
1978	2.4173	3.63082	5.01318		2.16237	2.48979	5.74653	1.93618		4.26056	2.85885	3.20198	3.79367		9.37835	3.61837		4.22824						1.93741	5.38261						2.02303				4.98828	8.67992			7.68907			1.75981	6.58067	2.37442		3.03324
1979	2.51433	3.20815	4.68907		1.95234	2.71487	5.57759	1.87085		4.23716	2.6381	3.08226	3.68851		9.28026	3.53022		4.38118						1.84157	5.26349						1.57493				4.30085	9.60455			8.03651			1.76667	6.57095	2.87462		3.05229
1980	2.45917	2.68695	4.14659		1.9559	2.44873	4.66982	2.01275		4.26733	2.40797	3.02544	3.22165		9.34862	3.64399		4.54748						2.03648	5.37353						1.4465				3.77242	7.78923			5.77025			1.68123	7.11872	3.38299		2.86579
1981	2.45192	2.87945	4.03808		2.36314	2.53842	5.28193	2.52481		4.61945	3.16888	3.91108	3.73125		10.6448	4.22134		4.49783						2.07384	4.95766						1.54781				3.85596	9.06823			6.71242			4.90932	9.20502	3.81499		3.11815
1982	2.40493	3.29242	4.06109		2.87974	3.1065	5.45384	2.72228		4.53727	3.50914	4.09336	4.25979		11.372	5.58413		4.35196						2.3048	5.27543						1.77888				6.03569	9.9129			5.93162			1.88453	9.88335	4.08513		3.40806
1983	2.49422	3.96657	5.00898		3.16686	3.13759	5.34062	2.94157		4.51456	3.93391	4.65771	5.25813		11.4915	6.80593		4.45237						2.52308	5.99965						2.0839				9.0613	10.136			6.38987			1.68582	9.68776	4.73202		3.63545
1984	2.53298	4.75833	5.10289		3.51983	3.14223	5.50028	3.27343		4.6102	4.20923	4.87929	6.40565		11.7718	6.82789		4.45994						3.1052	6.90181						2.25037				6.70333	12.2048			6.77281			2.09872	10.8451	6.69351		3.74685
1985	2.60187	4.82635	5.10337		3.70964	3.44043	5.7886	3.41407		4.83781	4.14723	5.03306	5.56207		12.142	6.61813		5.70001						3.34133	7.12063						2.56868				8.03774	13.2132			6.56212			2.86197	11.1059	7.40721		3.94771
1986	2.8962	4.33239	4.06891		3.51108	2.65724	4.93016	2.55528		4.93698	3.31481	3.78453	4.59048		9.74535	5.32702		5.745						3.04688	6.10191						2.68451				7.63558	10.6969			4.82951			2.35105	7.95327	6.31863		3.46533
1987	2.94879	4.16406	3.69891		3.1222	2.53496	4.30911	2.16227		4.69236	2.98972	3.14941	4.25567		8.65239	4.9613		5.42747						2.98485	4.67571						2.68185				9.36374	8.17947			4.42651			1.78462	7.00106	7.04952		3.31971
1988	3.02242	3.91091	3.31619		3.42048	2.38849	4.4646	2.17709		4.35573	3.17023	3.24452	4.0264		8.23049	4.79397		4.85912		2.49681				3.37151	4.67377			1.55274			2.44933				7.1268	6.30374			4.45396			1.90598	7.2177	8.49574		3.21357
1989	3.1386	4.21882	3.0539		3.95305	2.78446	4.68964	2.5137		4.14089	3.51912	3.8342	4.3358		8.49234	5.07971		4.58474		2.67693				3.94234	4.97516			1.44795			2.4356				7.0237	6.1846			4.14714			2.34862	8.81506	7.70767		3.44269
1990	3.28601	3.77807	2.65388		3.53164	3.03238	3.92248	2.39271		4.20222	2.99888	3.45539	4.06889		7.63954	3.94934		4.53351		2.1542				4.77596	3.81737			1.41561			2.4978				6.05768	6.15693			3.45974			2.08043	7.23397	6.26761		3.34992
1991	3.27833	3.41457	2.60035		3.64251	2.96926	3.6561	2.72996		3.70748	3.15794	3.51097	3.66487		7.93856	3.55367		4.57336		2.22202				7.94042	4.27023			1.57376			2.57878				4.82035	5.92639			3.34669			2.00367	7.23201	5.05797		3.29372
1992	3.31964	3.35606	2.4785		3.69009	2.82041	3.59626	2.69117		3.70278	3.07282	3.44597	3.68676		7.99974	3.45565		4.84358		2.29643				4.7277	3.94573		2.40301	1.71785			2.40644				4.41358	6.15129			2.87606			2.29735	6.88865	3.85204		3.20539
1993	3.39726	4.0711	3.12206	16.9526	3.99612	2.52691	4.57619	2.79499		3.81251	3.21135	3.66148	3.82199		8.80523	4.45562		5.09783		3.02825				4.90112	4.80233		2.71386	1.5327			2.37558				4.40371	6.02469			3.28761			3.06031	7.27368	3.74693		3.58837
1994	3.52036	4.0896	3.10388	8.52673	4.08416	2.27545	4.29667	2.78503		4.1307	3.40141	3.76951	3.96574		9.67791	4.2869		4.93503		2.38919				4.76397	5.01535		2.65931	1.72597			2.35037				4.66081	5.42746			3.31165			2.5648	6.74421	4.71549		3.36848
1995	3.63436	4.10739	2.81567		3.59817	2.13247	4.02775	2.51353		4.34859	3.06901	3.28565	3.64203		8.67908	4.02422		5.06678		3.02975	2.09187			4.40157	4.52152		3.12162	1.68404			2.27597				7.12806	4.88763			2.87317			2.4135	5.55872	4.7548		3.21076
1996	3.7691	4.18376	3.04381		3.3343	2.55749	3.95786	2.81124		4.34611	3.0407	3.19025	3.26527		9.2463	3.51065		4.8007		2.28569	1.97281			4.42573	4.53432		3.20677	1.83267			2.31907				6.91486	4.42593			3.14508			2.76861	5.80374	4.09772		3.35176
1997	3.94942	4.66641	3.53112		4.14557	2.90369	4.50868	3.32407		4.56288	3.99148	3.83086	4.08366		9.80318	4.07784		5.18139		2.32316	1.64463			4.60533	5.14635		2.76675	2.3066			2.61766				6.4746	4.38544			3.57256			2.76863	6.94941	4.70528		3.68226
1998	4.21967	5.02298	3.7518		4.37309	3.24896	4.50276	3.44374		5.12071	4.20537	3.9858	3.92679		11.3143			6.27547		2.31343				3.57455	5.28808		3.19957	6.25038			3.83854				6.61002	5.68219			3.55631			3.22243	7.16089	4.8733		4.06919
1999	4.42538	5.46485	4.18238		4.54153	2.84187	4.93715	3.83094		5.32188	4.72002	5.24192	4.38654		11.8442			6.33914						3.81653	6.07221		3.31027	4.55215			3.31171				6.19651	5.89496			3.83474			3.23907	7.59863	4.59147		4.15671
2000	4.5581	6.34301	5.13966		4.74765	2.92856	5.58131	5.04224		5.72637	5.87148	6.37171	5.0089		13.7765			7.19272						3.64162	7.82823		3.00643	4.529			3.2799				5.92805	6.97771			4.75849			3.57813	9.5496	4.57172		4.53911
2001	4.63226	7.06395	5.73292		4.3387	3.47681	5.30849	4.95275		6.09401	6.11278	6.16873	5.06777		11.1275			7.85675						3.40468	8.13566		3.04759	4.65261			4.05465				5.47449	7.46376			5.01204			4.06373	9.51349	4.82755		4.77893
2002	4.76569	7.21814	5.52992		4.12165	3.81572	5.13952	4.70413		6.20482	5.88346	5.7601	4.88458		11.1322			7.51956						2.74444	7.72977		3.05345	2.79326			4.33191				4.42345	6.65831			4.57407			4.95429	9.24562	4.16518		4.83259
2003	4.84058	6.82383	4.67742		3.27667	3.74088	4.20931	3.66578		5.37927	4.91967	4.78564	3.85865		6.89664			6.38636						2.50467	6.50789		2.90119	2.07087			4.1955				4.55913	5.35739			3.86382			3.19994	8.25658	4.00971		4.49093
2004	4.89422	6.08173	4.30965		2.97875	3.6244	4.231	3.37285		5.0643	4.57301	4.28847	3.80339		7.98422			5.65011						2.2989	6.15212			2.03651			4.08826				4.75982	4.35876			3.49824			2.53225	8.12045	4.12857		4.3828
2005	4.92623	5.91621	4.462		2.94982	3.98369	4.23062	3.30974		4.7321	4.79279	4.45985	3.97835		8.00884									2.35639	6.08356		2.85377	2.34721			3.8868				4.40026	4.2433			3.47112			2.72268	8.88433	4.17084		4.43922
2006	4.78796	5.09334	4.47624		2.9563	4.45411	3.94699	3.37089		4.67898	5.06951	4.76218	3.62337		6.54992									2.20293				2.31639			3.75163				4.57236	4.54812			3.79332			3.07502	9.54806	4.45129		4.52345
2007	4.82098	4.79743	4.13916		2.77222	4.77723	3.66629	3.10664		4.49764	4.96384	4.20134	3.63403		8.06198	3.72304								2.01117				2.53773			3.76911				5.13146	3.9319			3.36769				10.4091	4.05528		4.58108
2008	4.76397	4.64168	3.7844		3.37938	4.30115	3.19031	2.5925		4.7012	4.80431	3.60141	3.2943		6.6249	3.42057								1.64954	5.10166			2.80247			4.43643				4.99401	3.83667			3.46799				9.22688	3.12931		4.32761
2009	4.77471	5.31445	4.11762		3.14899	3.8623	3.48705	2.65694		5.18516	5.0815	3.71228	3.5548		7.94158	4.03096								1.6864	5.31421			2.97629			5.12469				5.91157	4.22553			3.50662				8.54381	3.02702		4.33783
2010	4.82157	5.52048			3.53237	3.7774	3.7506	2.68692		4.8107	4.84571	3.57184	3.54703		5.27949	3.40465								1.72732	5.29209			2.56571			4.6561				5.53326	3.49448			3.684				8.29779	2.7736		4.28118
2011	4.72548	5.40714			3.53917	3.42396	3.62301	2.68253			4.5372	3.54262	3.3866		6.96048	3.20577								1.56703	4.68452						3.8803				5.55995	2.94943			3.46896				6.64732	3.21146		4.08089

## Sheet: EIRp_Elec_Ind
Year	United States	United Kingdom	Spain	Russia	Netherlands	Japan	Italy	Germany		Canada	France	Austria	Denmark	Finland	Norway	Sweden	Argentina	Australia	Belgium	Brazil	China	Chinese Taipei	Columbia	Czech Republic	Greece	Hungary	India	Indonesia	Iran	Iraq	Korea	Kuwait	Libya	Malaysia	Mexico	New Zealand	Nigeria	Poland	Portugal	Qatar	Saudi Arabia	Soth Africa	Switzerland	Turkey	Venezuela	World
1978	3.73425	4.98779	10.2595		5.71685	3.72518	6.65867	3.48672		6.73365	7.10225	6.47307	5.25969		22.9078	5.84505		6.10746							12.6213						3.1439				7.98124	11.2156			13.293			3.70537	8.46804	2.97285		4.90157
1979	3.82507	3.50521	9.59623		3.90021	4.06225	6.45407	3.39258		6.40844	6.53091	6.12131	6.17377		22.8437	5.17766		6.32068							10.527						2.18723				7.16808	11.8136			12.7905			3.72029	8.51948	3.78609		4.80113
1980	3.57213	3.73188	7.48992		3.7836	3.32327	5.51298	3.51385		6.1867	5.72769	6.05088	6.55202		18.1779	5.35881		6.40015							9.42902						1.74871				6.46701	9.46818			9.03836			3.54467	9.16988	3.4946		4.33376
1981	3.54357	4.13577	7.20981		4.4179	3.35763	6.75247	4.45008		6.53526	7.59035	7.94367	7.31578		19.4509	5.97652		6.17548							9.91533						1.85291				6.74793	10.9865			9.27373			3.72505	11.8771	3.91065		4.70997
1982	3.33289	4.73763	8.03445		5.45139	4.07297	7.22507	4.79322		6.34908	8.86709	8.34877	8.3396		20.2947	8.18813		5.87751							8.80997						1.94952				9.55651	11.9998			7.97145			3.60924	12.5454	4.3338		5.16747
1983	3.61059	5.88107	9.12719		6.10093	4.13717	7.2624	5.18506		6.27495	9.34862	9.47742	10.352		22.0801	9.82711		6.05366							9.57927						2.30013				13.9405	12.2205			8.28393			3.1073	12.1437	4.99624		5.55424
1984	3.78942	7.15125	9.25909		7.17354	4.17111	8.1291	5.77245		6.53685	10.4955	10.4388	12.7861		23.936	9.67779		6.46883							10.3527						2.5023				10.055	15.1753			8.91253			3.88264	13.3603	5.37687		5.832
1985	3.92801	7.23953	9.4423		8.17609	4.56198	8.2776	5.97826		6.98641	10.5817	10.8694	10.3867		23.3555	9.30932		8.27496						3.77715	10.1378						2.83866				11.1635	16.3142			8.42591			5.21685	13.8679	5.69448		6.07806
1986	4.37976	6.54035	7.33816		7.42179	3.55126	7.56445	4.45159		6.97383	8.75049	8.1653	11.1814		18.2597	7.6224		8.68644						3.3913	8.98493						2.98975				10.588	13.2139			6.18911			4.30013	9.76869	4.02107		5.37471
1987	4.62936	6.45902	6.24921		6.92192	3.48236	6.99292	3.71045		6.83563	8.13289	6.87481	12.8761		17.2592	7.3411		8.26597						3.04836	7.45375						3.12085				10.4818	10.8904			5.75236			3.57251	8.62205	4.06641		5.20517
1988	4.89999	6.07777	5.67535		8.29446	3.38476	7.39774	3.85334		6.37479	8.58424	7.08243	11.3484		16.265	7.09732		7.60991		3.17775				3.44325	7.73854			2.26921			3.07241				7.89726	9.33044			6.03396			3.84437	8.89569	4.56111		5.14903
1989	5.11278	6.97858	5.90633		9.22378	4.01335	7.82788	4.48094		6.03708	9.40276	9.20493	10.962		17.3891	7.59226		7.24421		2.95385				3.94234	8.38444			1.95848			3.18252				6.994	9.5016			6.01146			4.47218	10.9411	4.3782		5.57836
1990	5.43056	6.33158	5.16995		7.9135	4.38581	6.29935	4.29355		5.96196	7.9842	8.22894	10.7535		15.9389	6.96155		7.07351		2.8491	1.53184			4.3254	6.95217			1.91199			3.43636				6.94287	9.87045			5.19208			4.11829	8.98695	3.86863		5.38965
1991	5.43691	6.09803	5.02626		7.85289	4.28708	6.0263	4.95722		5.34762	8.28022	8.05675	9.72313		16.3258	6.52805		7.25248		3.84941	1.73264			3.07371	7.37138			1.76029			3.71406				5.99043	10.0687			4.96701			4.06399	9.02316	4.02154		5.38239
1992	5.66534	5.9974	4.98774		8.59211	4.02691	5.8163	4.97304		5.44827	8.25194	8.42075	10.3675			6.58934		7.81649		3.82739	1.84662			2.6229	6.92785		1.08311	1.80002			3.64366				6.07371	10.5524			3.98397			4.29382	8.53484	3.82945		5.23782
1993	5.82986	6.88955	6.524		7.09013	3.57397	7.34175	5.29012		5.72974	8.59989	8.3717	9.758			10.337		8.60054		4.876	1.59005			2.72284	8.26868		1.15428	1.63469			3.56556				6.34974	10.7584			4.57543			4.64727	9.05215	3.89524		5.3933
1994	6.26505	7.42291	6.97021		7.29478	3.29682	7.70807	5.57382		6.00623	9.59954	8.69064	11.372			10.0335		8.47711		3.86672	2.38513			2.73487	8.97418		1.11616	1.83648			4.38186				7.63329	10.514			4.81079			4.82448	8.3673	4.66336		5.60704
1995	6.55901	7.62801	7.23533		6.51381	3.10322	7.35323	5.10947		6.32889	8.49672	7.76608	10.973			9.65241		6.64821		5.31535	2.24301			2.70655	8.30199		1.20883	1.82408			4.17487				11.8226	9.35094			4.41096			4.21203	7.34398	4.73129		5.55994
1996	6.87452	8.02803	7.81694		6.90024	3.74282	6.93604	5.89001		6.35387	8.79188	7.61067	9.63989			8.57252		6.31953		5.54491	2.12465			2.85885	8.75481		1.18267	1.99254			4.26466				10.2536	9.08821			5.10084			5.33164	7.69279	4.18392		5.85295
1997	7.34958	9.02566	9.52674		8.54419	4.13072	7.64349	7.37349		6.68943	10.9628	8.01435	12.4195			12.0773		7.31769		5.87623				3.28551	9.83684		0.990439	2.49072			4.83264				8.66022	8.68667			5.92098			5.47819	9.25175	4.86242		6.66538
1998	7.78001	9.3412	10.2382		8.96406	4.72366	7.56993	8.16253		7.41084	11.6148	8.5313	12.2623					9.09235		5.19506				3.42472	10.4785		1.13143	5.7339			6.74065				9.55183	10.7718			6.05841			6.64955	9.55436	5.10094		7.16633
1999	9.18857	9.98653	12.0369		9.86116	4.23655	8.47155	10.2015		7.72532	13.0753	12.4348	13.8773					8.80661						4.04506	10.8788		1.17016	4.22999			5.82844				8.83478	12.5374			6.92456			7.77867	10.9783	4.83295		7.85395
2000	8.1253	12.2181	14.1396		10.9065	4.37767	8.5021	15.0007		7.89636	16.6913	19.5757	17.1425		40.98			10.0606						4.60687	13.1105		1.23863	3.10407			5.32885				7.95923	14.9732			8.48936			8.30102	15.3891	4.82708		8.6576
2001	7.87483	13.9878	15.1504	2.91356	10.711	5.12526	7.29917	13.9688		7.69322	17.3143		16.5709		31.8696			11.2398						4.77076	13.2331			3.26302			6.03126				7.77566	16.0916			8.94812			10.8624	15.3519	5.0893		8.76561
2002	8.39338	14.6449	13.0071	2.68156		5.78855	7.06684	13.1387		8.54931	16.8164		14.6493		29.209			10.2661						4.24451	12.9359			2.477			6.38631				7.27334	14.323			8.48029			12.8588	15.3981	4.38612		8.91123
2003	8.20717	14.4421	11.9392	2.39392		5.71446	5.34258	9.83874		7.02498	13.9379		10.8087		18.7364			9.75245						3.77286	11.2073			2.04026			6.12279				6.6399	11.081			7.27492			8.26652	13.9793	4.25979		8.08576
2004	8.33294	12.5645	10.9061	2.53139		5.59207	5.01211	8.66371		6.98825	12.999	7.91225	11.2313		21.544			9.13025						3.36721	10.3742			2.03145			6.17278				5.53467	10.2819			6.60779			7.01488	13.8548	4.57867		7.78047
2005	8.11506	10.1704	8.2224	2.56256		6.12974	4.80477	8.37227		6.47662	13.6237	7.63457	12.637		22.4942									3.08895	10.1919			2.31912			5.87503				4.87005	9.40265			6.36115			7.54242	15.3087	4.62547		7.63444
2006	8.08553	8.11727	8.07532	2.41907		6.77896	4.25424	7.93125		6.57871	14.3803	7.60854	12.0611		18.4406									2.86796				2.11931			5.67713				4.65345	10.1454			6.33656			8.35572	15.7552	4.93649		7.6375
2007	8.03065	8.07949	8.63838	2.56798	6.47943	7.27133	3.98418	7.50674		6.32977	8.42303	6.68785	12.3987		22.0626	9.62028								2.54404				2.33531			5.53341				4.67544	9.27862			5.58893				16.9614	4.54055		7.44544
2008	7.85859	7.35564	6.59237	2.01609	5.87293	6.36167	3.36042	6.49007		6.048	7.53144	6.0069	10.0496		15.765	7.83632								2.08803	7.12771			2.64915			6.53543				3.80715	8.82714			5.8025				15.1844	3.71552		6.75838
2009	8.06614	8.15163	8.47574	2.12808	5.76775	5.57256	3.58898	6.05185		7.44595	7.58254		11.7194		17.9465	9.45652								2.19394	7.08346			2.72219			6.82017				5.49311	9.84387			5.92371				14.971	3.63083		6.79955
2010	8.22174	9.07568		2.13646	6.34879	5.67996	3.82432	6.30528		6.5078	7.55918		11.0493		12.5921	7.70216								2.22733	7.35969			2.39074							4.71635	8.46466			6.59306				14.597	3.38417		6.79843
2011	7.92382	9.46642			6.90652	5.15756	3.4887	6.04946			7.41992		12.6868		16.284	7.32099								2.0726	6.97932										4.1105				5.7816				11.2436	3.91842		6.65481

## Sheet: EIRp_Coal_Res
Year	United States	United Kingdom	Spain	Russia	Netherlands	Japan	Italy	Germany		Canada	France	Austria	Denmark	Finland	Norway	Sweden	Argentina	Australia	Belgium	Brazil	China	Chinese Taipei	Columbia	Czech Republic	Greece	Hungary	India	Indonesia	Iran	Iraq	Korea	Kuwait	Libya	Malaysia	Mexico	New Zealand	Nigeria	Poland	Portugal	Qatar	Saudi Arabia	Soth Africa	Switzerland	Turkey	Venezuela	World
1978		14.3485			6.49605		10.1264	6.05473			11.6336	6.23748				9.73557								29.816																			16.6277			10.3126
1979		12.0899			5.35488		11.753	4.80011			10.4421	5.62278	14.0351		17.9618	8.73487								20.0012			14.3023																16.7049			9.75833
1980		10.1197			6.0731		11.0429	4.51868			7.77995	5.48323	12.8961		12.9059	9.19616								23.6196			11.5191																16.9223	18.3146		8.86716
1981		11.443			8.22881		13.3917	5.59769			9.05469	6.62962	14.2992		15.3226	10.0809								23.6969			11.9709									17.0469							20.8392	14.8361		10.3406
1982		13.4259			9.78378		17.7887	6.04364			10.7481	7.65081	16.6828		18.9007	11.849								26.2407			13.7996									17.9318							20.9507	19.738		12.2861
1983		15.9618			10.0439		20.1038	6.51407			13.3013	9.29778	21.2714		22.2944	13.6164								28.166			15.9129									20.0643							19.6	21.5402		14.0323
1984		17.8975			10.7403			6.97065			13.4993	9.85905	23.964		25.3226	13.3202								34.0442			18.4808									23.7622							21.6181	28.7404		14.1756
1985		17.9531			10.9317			6.83734			12.4816	9.61618	21.3655		24.945	12.5991								36.2419			20.735																21.4747	25.7505		13.7861
1986		16.2483			7.07204			5.70744			9.21651	7.42741	14.4309			9.84024								32.3642			21.8237																15.1833	22.5272		11.1619
1987		15.5063			6.02921			4.65383			8.42458	6.91765	12.2893			9.80585								20.5369			23.9737																13.3198	24.4245		10.3696
1988		15.125						5.02877			10.4909	7.74125	13.0935			9.66913								23.2613			27.7073																13.6718	31.276		11.7117
1989		17.3115						6.12514			12.076	9.44077	15.5771			10.8307								27.421			33.8631																16.8356	22.2093		13.2109
1990		15.8168						6.2174			10.3334	7.87754	12.6195											48.3633			38.305															62.7931	10.5938	18.8607		13.7855
1991		15.3314						7.51579			10.4365	8.30207	12.4282											37.8537																		54.0458	10.4124	19.8117		12.3291
1992		14.7027						8.10196			9.9322	7.87064	12.4716								7.93299			27.0138																		54.7824	9.84672	17.9156		11.6261
1993		17.7425						8.4426			10.9204	9.56728	12.9875								7.02184			21.8019																		63.3143		19.2969		12.8468
1994		17.7072						8.53749			11.5697	10.3549	12.9132								9.82309			21.777																		70.0909		23.5972		13.6233
1995		18.5654									10.4253	9.15771	11.6012								8.92495			18.594																		57.3981		21.718		15.0137
1996		18.0612									10.4101	9.19088	10.5891								9.60126			19.2998																		60.3515		17.9451		14.8172
1997		18.9778									12.6565	11.1086	12.8783								10.0058			20.8396			6.86799															62.2236		20.8923		15.5416
1998		19.0525									12.7651	11.7091	12.1169								12.7834			18.5186			7.62924															70.2961		22.1859		16.3407
1999		20.3322									14.1217	12.3631	13.2157								14.0578			22.8878			7.64689															81.5867		23.0599		17.7287
2000		22.4505									17.1329	15.5291	16.2882								15.6575			22.0833			8.03396															86.4642		30.0887		20.2072
2001		23.5107									17.7347	14.5111	16.619								17.8466			22.5162			8.66638															95.5165		41.5665		21.866
2002		22.9505									17.1663	13.6635	14.7167								17.2159			17.7151			8.5285															105.588		33.3781		21.1409
2003		21.2677										10.7608												14.2301			8.33445															68.0445		30.3654		21.5806
2004		18.9922										9.11431												14.0074																		57.8642		25.0833		21.4779
2005		18.1585										10.5679												13.8245			7.57717															64.7656		23.751		18.7454
2006		17.8408																						13.5237																				21.4954		18.2701
2007		17.2349																						9.15418																				15.487		16.5484
2008		15.8699																						6.91925																				19.8051		16.1231
2009		15.8337																						7.77452																				19.93		16.1573
2010		16.0988																						7.70549																				18.1204		16.064
2011		17.5552																						12.4559																				24.8873		18.7485

## Sheet: EIRp_Coal_Ind
Year	United States	United Kingdom	Spain	Russia	Netherlands	Japan	Italy	Germany		Canada	France	Austria	Denmark	Finland	Norway	Sweden	Argentina	Australia	Belgium	Brazil	China	Chinese Taipei	Columbia	Czech Republic	Greece	Hungary	India	Indonesia	Iran	Iraq	Korea	Kuwait	Libya	Malaysia	Mexico	New Zealand	Nigeria	Poland	Portugal	Qatar	Saudi Arabia	Soth Africa	Switzerland	Turkey	Venezuela	World
1978	22.1348	30.5812			22.6	32.9989	39.7506	5.26013		17.7437	33.0222	19.9153	23.5297		56.8809	18.2761									10.2297		21.7666									35.5184							57.3645			26.6361
1979	23.2699	24.6887			22.297	36.2114	58.9999	5.5511		19.8658	27.8496	17.3527	24.7301		56.2245	17.5614									10.1274		11.2523									38.5921							57.7321	18.2138		28.2558
1980	24.2277	20.6002			25.9054	39.9439	61.2645	5.52487		21.657	22.8315	17.891	23.9224		45.1489	19.4097									10.8224		9.46767				25.0265					39.4364							49.0562	20.9468		29.1783
1981	24.8823	25.0703			27.8058	40.0702	53.9254	6.61958		22.5323	28.8754	21.1722	24.7466		43.5467	20.0129											11.3847				25.4898					40.2613							50.472	20.178		30.0303
1982	25.92	26.1135			32.2032	43.4536	56.047	7.16894		22.6091	31.8885	24.5461	29.3034		63.1728	24.2225		34.0759									11.534				25.7761					39.5792							65.8806	27.2954		32.3923
1983	29.2581	31.527			37.6914	52.235	76.6058	8.31937		23.2646	33.264	37.3809	42.0198		73.1994	36.9144		46.3736									10.0202				29.951					43.854							77.5138	30.5181		38.5985
1984	31.112	37.7845			39.3892	54.2844	93.2949	8.90266		24.7223	36.5976	42.8321	53.9129		99.0843	35.9617		51.1582									11.686				34.9906					51.536							87.4493	39.3561		42.1245
1985	34.4297	38.6481			41.3895	67.3026	84.7883	9.24676		27.3198	36.8059	43.9852	42.1736		85.8988	29.9544		66.4716						44.2693			11.6799				39.289												84.2591	45.9102		46.8453
1986	37.622	36.5557			42.3039	66.3315	96.825	6.47158		28.9304	31.2737	34.4073	40.5784		92.001	26.327		66.6503						38.654			12.4718				36.8335												94.5863	48.731		47.5988
1987	40.6376	36.6467			47.2554	73.1579	110.779	5.63095		26.0818	29.613	35.8552	43.336		112.645	29.2548		64.1999						31.0925			11.0479				34.0392												101.197	61.3545		51.5022
1988	43.1193	40.209			53.8108	72.6987	100.278	5.72451		26.0458	32.6824	44.0502	42.6648		105.805	28.4289		64.7893		40.744				35.4081			11.1297				29.4												97.4861	49.8675		51.5324
1989	46.2885	46.1954			52.7202	74.4249	96.5256	7.07927		25.6094	36.837	51.9733	44.0104		93.6145	31.4648		59.9612		44.0315				42.1977			13.8102				27.9053												108.539	43.7907		53.5176
1990	49.3722	44.6272			49.957	77.9337	99.0559	7.34269			31.6779	46.2078	40.4524		85.855	32.0612				46.8252				44.4602			15.4733	13.1991			28.7937											51.5065	100.516	37.8828		55.3565
1991	50.9766	45.0328			53.774	84.8371	103.344	10.011			32.1644	46.3455	40.503		94.2424	25.8077				55.6123				50.8406				16.2404			31.4692											47.5616	105.302	37.1797		59.1393
1992	53.7146	46.3391				90.7809	117.449	9.36827			31.6624	48.8085	43.8599		115.388					52.2095	4.68802			44.1205				19.371			30.482											48.3863	119.01	37.7089		61.973
1993	54.8856	60.5587				86.4156	117.392	10.2482			33.5492	56.646	66.6469		145.781					56.5723	5.47748			44.6002			19.0788	6.23543			31.6902											54.9262	146.795	49.9955		62.2675
1994	57.6182	63.8732				97.6803	129.32	11.4389			35.5154	62.2214	70.9767		116.936					37.1688	15.0373			47.5993			19.6447	8.03949			34.0119											57.6946	144.378	64.7419		67.2974
1995	59.9241	66.8076				91.5644	112.303				31.8051	55.4234	65.8408							46.4077	14.6032			44.6871			20.3108	16.3945			33.6744											53.5978	117.552	57.6994		69.1841
1996	62.1401	76.0606				89.7427	118.673				31.4241	65.067								44.4181	18.0656			48.2201			23.3696	18.0711			35.4849											62.3506	120.455	60.361		70.4348
1997	65.3845	83.1329				97.1041	126.697				38.5248	79.59								47.4984	15.6248			54.0103			22.8334	23.4184			41.6833								101.716			67.7923	143.794	59.4014		75.9073
1998	68.8576	83.3705				107.456	146.864				38.3173	82.7246								60.0983	16.9427			55.4368			22.1335	61.0433			59.3555								133.024			61.017	149.511	64.1208		82.8667
1999	73.2112	90.3507				119.795	181.266				41.9137	99.6152									19.4598			62.0347			22.7663	44.1852			40.3247								146.702			64.1891	163.62	69.0782		91.567
2000	75.7183	101.093				128.652	164.456				50.3294	107.081									22.2751			63.8527			22.9208	42.7456			35.0401								129.889			75.8796	160.714	73.0897		95.6469
2001	77.8136	100.69				123.125	145.847				50.0694	102.814									24.8379			62.4851			23.3197	41.3642			41.7396								105.946			82.0177	137.448	75.1925		93.0519
2002	81.1837	104.238				129.421	160.904				50.3868	78.3647									22.7471			54.1935			20.8086	34.9361			43.2321								118.761				160.303	59.4097		96.8426
2003	83.6302	100.06				144.088	152.888				42.5993	65.5151									21.2405						20.901	32.7177			40.5639								104.409			59.182	133.203	57.9812		100.382
2004	74.8836	87.2893		19.7153		99.525	104.821					34.6743									15.5253						19.9443	34.3714			42.7549											59.5431	95.7391	70.8233		78.7386
2005	65.8437	80.1828		18.9627		86.188	93.8392					34.1776															19.7316	36.7171			38.9243											59.3896	102.103	70.3602		72.9663
2006	63.3127	86.4463		17.9588		84.8069	106.638					36.7972															22.8805	27.5337			47.8328												91.6279	66.9281		72.5775
2007	62.3513	83.3171		17.3503		80.0004	91.2276					35.7835															21.8532	29.8933			40.9937												80.1393	45.5058		68.4794
2008	53.9505	73.7971		15.5367		49.1915	56.1116					30.5231															21.1562	23.5215			25.3309												46.4345	38.6235		49.9952
2009	53.2079	88.589		17.3749		53.5474	72.1814					31.5979															23.829	16.723			33.5338												72.0866	34.763		53.581
2010	55.3256	75.6973		15.38		53.7263	73.22					36.0498																											41.2178				68.8542	36.7217		55.5784
2011	59.6853					43.1422	53.308					28.8021																											23.7589				55.2376	44.9622		51.0129

## Sheet: EIRp_Coal_Elec
Year	United States	United Kingdom	Spain	Russia	Netherlands	Japan	Italy	Germany		Canada	France	Austria	Denmark	Finland	Norway	Sweden	Argentina	Australia	Belgium	Brazil	China	Chinese Taipei	Columbia	Czech Republic	Greece	Hungary	India	Indonesia	Iran	Iraq	Korea	Kuwait	Libya	Malaysia	Mexico	New Zealand	Nigeria	Poland	Portugal	Qatar	Saudi Arabia	Soth Africa	Switzerland	Turkey	Venezuela	World
1978	27.1349	29.4107	33.7728		31.8478	18.9607	44.2891	7.192		19.2299		5.60348		23.4285		27.2866		65.0609	27.0333					54.2654															63.4105			55.8222				24.8652
1979	27.0555	24.4555	24.5132		31.1835	20.8014	49.9444	6.93072		17.113		6.15157	54.8679	22.6482		22		62.5404	33.8999					50.6433			20.068												56.6786			56.3973		45.2425		25.3819
1980	27.3298	20.7052	22.3858		25.2808	24.336	44.9942	7.6412		17.6845	36.7017	6.30594	49.0764	18.7416		18.9901		63.2522	30.4063					57.0402		39.2488	16.7621								63.4899			169.265	50.5193			49.4702		42.6239		28.5366
1981	28.0696	22.7001	29.5693		24.1584	29.2599	37.2858	9.01695		19.1856	35.7424	8.71163	45.424	16.7115		20.0129		58.2477	31.5073					45.3577		40.5276	20.6573								46.9252			69.8676	49.3501			48.8289		36.4618		28.7099
1982	28.1554	26.5184	29.9889		27.18	33.4933	40.2769	9.97902		18.708	43.2441	16.1298	48.7686	21.4079		24.773		43.9505	36.3218					49.2057		41.5015	20.4998								33.7135			33.0742	44.0269			48.5281		45.4871		30.3264
1983	30.47	31.3334	38.2015		33.4437	37.7481	51.027	11.4743		18.9425	50.9939	20.0921		35.7775		36.7343		50.7852	39.8439					52.5821		45.644	21.6881								46.7187			32.9294	38.5341			47.1311		52.1839		34.5007
1984	32.1051	37.8071	41.211		36.6357	39.7702	66.9839	12.9554		19.8633	57.0831	22.3798	99.0063	42.066		42.1082		50.9374	40.669					51.9869		45.0795	25.1713								39.9293			39.5097	38.9768			62.1748		57.1327		37.9912
1985	34.6678	37.0569	37.7572		37.9943	47.9384	65.4135	13.1248			57.0213	21.3325	72.9231	35.7473		39.9634		65.1031	43.49					54.1735		42.2519	25.6287								47.1996			43.5179	61.208			90.5562		62.5322		41.9633
1986	37.9696	33.6005			43.2759	40.84	71.4711	10.9179			52.7266	22.3953	85.8351	34.4763		36.7611		62.6292	45.5649					47.6667		37.274	26.7936								44.719			42.8382	63.3228			81.2022		43.7302		40.438
1987	40.5534	33.9934			46.1281	40.3513	80.0322	9.96039			55.62	28.5577		37.5317		43.4104		58.3291	49.9904					42.9194		36.9492	22.4733								41.2478			47.701	73.3793			63.7587		57.0737		41.4627
1988	43.3051	31.1919			50.4408	38.0299	77.3757	10.2454			64.6398	28.3864		41.548		42.6434		54.9591	55.6244	23.9358				48.4792		36.0883	22.8012								37.5854			49.9047	77.5718			67.5908		67.8159		41.633
1989	46.4226	37.1773			49.3976	40.5407	77.2712	11.6177			64.4199	41.7434		39.6865		46.2826		51.5453	60.6799	24.1759				53.0467		42.9278	27.9448								48.351			109.102	70.7298			77.1393		60.8411		44.566
1990	49.8349	37.6687			43.9147	45.4919	71.2842	9.23233		24.3583	59.8602	36.3219		34.5654				48.2898	59.3563	25.1456				55.2239		27.6218	13.7945	14.803							46.9003			62.0407	71.777			70.4806		67.6674		44.6808
1991	51.2064	38.0447			43.6558	49.828	74.3644	11.2599		24.2682	64.91	33.4303		34.8875				48.3003	59.9014	30.4489				63.1144		30.3769	31.7774	18.5519							41.98			38.2809	75.5761			68.6796		55.9726		46.8783
1992	54.1438	37.9281			43.8402	52.083	71.3159	10.833		24.8481	70.8749	37.6		37.9908					60.9084	28.1929				58.3214		32.6897	37.545	20.2927							47.6496			40.855	81.5494			71.2913		51.5127		48.7907
1993	56.882	49.7344			49.7003	53.2123	77.3563	12.0107			71.9923	42.8001		45.4086					71.4803	30.4315				64.621		35.8562	32.4484	20.3833							50.2415			33.208	100.535			76.063		47.1245		52.1364
1994	60.4811	59.8296				55.3264	89.012	12.4942			79.9731	48.5812		36.8306					74.5647	19.5221				64.8877			33.2568	20.3207							52.1309			28.7736	109.961			80.0434		54.3357	40.9198	55.5773
1995	65.6871	63.2011				54.4803	86.4776	11.4095			71.1741			27.724					70.4743	24.52				62.5151			33.5579	22.6927							64.2851			28.0262	86.1525			76.4432		39.7614	42.8563	56.4168
1996	68.9001	64.016				58.6135	85.6813	33.3236			74.2937			29.1891					66.6647	24.4489				60.7738			28.6089	31.6094							74.4892			31.4133	90.4741			85.7675		41.3245	37.693	61.0183
1997	74.6829	71.3825				70.4137	93.2821	39.2653			80.9652			45.4211					74.8055	26.3837				64.5596			25.3421	36.3877							70.5893			36.5794	97.471			89.488		48.735	42.5846	68.5784
1998	78.0364	82.6332				84.0102	100.082	44.4565			95.7595			58.0348					96.3396	33.0776				63.0368			29.8987	64.6803							73.2648			37.9872	112.81			98.9777		46.8286	43.9564	77.1776
1999	82.0308	92.5733				95.1423		52.0018			105.855			67.4317					113.175			65.4401		75.0303			30.1664	38.3109							66.9669			46.5986	123.155			106.854		47.706	48.7139	84.1622
2000	86.9757	104.499				109.619		53.7346		97.8379	114.823	71.0393		74.5928					110.163			65.3463		84.4943			30.8149	37.3145							67.6206			52.5648	135.28			122.445		54.3595		92.6986
2001	91.6251	105.489				109.401		42.9342		98.4947	94.9159	84.6212		62.7691					99.7773			58.9393		85.9421			31.3023	36.132							66.9995			49.0303	109.921			140.204		79.715		92.3054
2002	85.5761	117.671				120.961		50.103		97.2237	102.958	74.0824		65.569					116.984			60.5776		83.3643			32.7348	30.5114							72.9442			49.8286	127.519			176.666		57.408		96.197
2003	86.6554	118.036					142.19	46.4852		85.5411	105.983	62.4797		59.0194					109.846			62.6794					33.1105	28.6463							79.5934			46.1022	111.646			113.822		51.9114		87.0262
2004	84.3392	96.8291					96.0535	33.0712		92.0116	73.5909	57.1207		45.0946					58.2005			41.9284					31.5337	30.0824			51.2678				65.8233			44.688	75.7344			99.6491		43.9198		74.3647
2005	78.0767	92.8587					83.4994	30.5152		80.3765	65.4528	50.9945		48.3222					55.9913			38.1079					31.4632	32.1067			46.9703				63.6334			41.2212	66.2844			89.5031		38.3456		68.4198
2006	76.2454	93.5031					115.289	34.1234		86.0532	72.2381	57.8632		46.3729					76.2009			42.5668					35.0134	24.075			53.4786				65.1736			38.6729	85.2294					44.679		71.2998
2007	74.6226	87.9558					78.9394	32.2449		76.2113	66.8762	72.7863		44.7105					68.8782			34.3183					34.187	26.175			43.262				61.8839			38.709	66.8755					39.4602		65.9087
2008	68.5122	61.7284					49.2939	19.0041		77.0093	47.8214	58.9326		27.2912					40.0313			21.7684					33.1819	20.5841			29.5211				50.8124			29.0318	38.0433					35.1449		54.1313
2009	65.2005	89.0638					67.7281	25.987		93.4878	58.5408	55.2861		40.4434					68.3958			29.7867					37.8077	14.637			34.0224				55.0806			29.9565	65.8853					33.2023		59.1635
2010	64.8088	78.8372					64.0349	24.6368			60.9404	63.1878		36.7802																					53.9092			30.4994	63.9456					33.9053		59.0786
2011	75.1302							43.4442				51.3026		30.8987																					62.55			31.461	48.505					103.076		68.2297

## Sheet: EIRp_NG_Res
Year	United States	United Kingdom	Spain	Russia	Netherlands	Japan	Italy	Germany		Canada	France	Austria	Denmark	Finland	Norway	Sweden	Argentina	Australia	Belgium	Brazil	China	Chinese Taipei	Columbia	Czech Republic	Greece	Hungary	India	Indonesia	Iran	Iraq	Korea	Kuwait	Libya	Malaysia	Mexico	New Zealand	Nigeria	Poland	Portugal	Qatar	Saudi Arabia	Soth Africa	Switzerland	Turkey	Venezuela	World
1978	14.2875	18.7162	17.2773		14.6373	6.41138	22.9747	8.99646		14.3416	10.7762		7.24564					14.3388						15.0306																			19.9676			12.0564
1979	13.7442	17.303	12.163		14.204	7.08592	20.2274	8.73885		16.0872	10.4579	10.0892	6.27072					15.0612						10.0793																			20.223			11.6842
1980	12.5747	15.8031	8.81406		13.343	6.29654	23.0941	8.15806		15.7977	8.9728	10.3028						13.5495						11.7439																			21.5266			10.9657
1981	12.4405	16.162	10.0394		14.875	6.56319	26.2976	9.5935		14.7371	10.3723	11.5891						14.2309						11.8289																			26.3168			11.539
1982	11.2026	16.267	12.4012		16.0332	8.11734	20.6977	9.57531		13.8441	11.4852	12.497						13.5943						13.0013																			27.8758			11.49
1983	10.3746	18.1405	13.8545		16.3979	8.32775	18.274	10.7662		12.701	12.5054	14.04						16.8581						14.0738																			27.5428			11.5047
1984	10.9556	21.2787	14.7039		17.4507	8.4149	20.9556	12.274		13.7126	13.7239	14.7152	18.7699					16.2424						17.1256																			32.019			12.3884
1985	11.6267	21.4182	14.2966		17.9149	9.29139	21.5192	12.5896		15.0041	13.0311	15.3767	17.3564					20.4377						20.723												36.9319							33.5648			13.0827
1986	12.9234	19.2737	11.317		13.564	7.32966	20.5813	10.5804		16.6121	11.0061	12.7012	13.8868					20.9415						18.6061												30.9974							24.6337			12.1205
1987	13.8467	18.6396	14.0883		16.0013	7.14587	18.9425	12.7653		15.975	11.8016	16.0647	10.6565					19.8285						17.0881												23.1154							22.9881			12.4879
1988	14.5295	18.2922	13.5225		17.4842	6.83029	17.4257	13.7031		15.7598	12.9564	17.3006	12.2169					17.4165						19.3017												20.2412							24.641	18.1394		12.7024
1989	14.9523	20.2937	13.3462		21.1718	7.11587	16.8267	15.3532		15.8906	14.3274	21.0539	15.097					16.4815						22.5697												20.7091							30.6637	27.3218		13.4827
1990	14.9248	18.3971	11.1315		16.6809	7.66524	12.9495	13.3644		16.2807	12.8304	18.5641	13.4513					16.3543						27.3422				19.1429								19.676							25.0975	20.1051		12.8252
1991	15.0286	17.1174	10.5678		15.3017	7.5499	11.2219	13.8512		16.8921	13.0526	18.4087	12.9186					16.0977						19.4825				21.7833								17.8863							24.9039	18.6213		12.6435
1992	16.316	17.7255	10.2769		15.4902	7.21521	11.1519	13.7496		16.7549	12.7512	18.9754	13.9258					17.0902						19.5747				23.874								19.359							24.4203	17.7366		12.9435
1993	16.1555	22.305	13.4839	443.682	17.3497	6.53443	14.1901	15.0274		17.692	13.9322	20.4188	14.4972					17.7042						20.2686				24.4995								18.6273							27.2661	18.9056		22.9777
1994	16.2272	21.8044	13.6567	406.245	17.3993	5.87129	14.3119	15.409		18.4263	15.0193	20.9076	15.1954					16.63						18.6799				27.8145								16.7112							26.7051	23.2883		20.7786
1995	16.9209	21.4812	12.1464		16.1716	5.50794	13.8202	14.4797		20.6995	13.8215	18.5274	14.8609					17.1189						17.6993				29.0387								14.1957							23.1104	23.174		13.316
1996	16.1819	21.7939	12.7898		16.6738	6.15185	12.973	15.6144		20.0164	14.3269	17.867	12.8683					16.2103						17.424				32.0206								12.5306							24.7556	23.3415		13.3805
1997	16.8773	23.3334	14.2431		18.4962	6.32141	13.9232	17.1998		20.868	16.542	20.3478	15.9161					16.8791						17.8671				40.996								12.0108							29.1006	21.2987		14.2702
1998	17.9805	24.8048	14.722		19.2284	7.67913	14.048	18.3325		22.2465	16.7897	21.7872	17.5493											13.5169	19.4056			126.725								14.3532							29.7223	23.8801		15.8533
1999	18.9924	26.827	16.561		22.0226	6.82886	15.4075	20.5518		18.4757	19.8731	24.2464	18.7823											14.2698	24.0023			96.9984								14.7223							32.5449	22.9776		16.2563
2000	15.7262	31.2501	16.5726	86.7028	23.4193	6.55349		22.0347		20.5558	23.2324	29.0716	18.192											12.5029	28.9905			103.248								20.8543							34.9562	20.1341		17.0809
2001	14.4287	33.5894	16.5782	76.2518	21.1624	7.55089		22.196		14.7218	20.2004	26.8345	18.8467											11.8026	29.918											26.1859							28.5844	22.508		16.0152
2002	17.9346	32.4157	17.1513	67.8421	18.885	8.27685		17.3548		19.1483	19.545	26.6991	19.1545											10.278	26.4755											24.3754			12.0543				29.6641	21.9383		16.8595
2003	15.584	30.3927	14.6181	52.5166	14.2477	7.86205		13.9055		13.1183	16.1528	16.6931	14.949											8.89058	21.5366											17.7531			10.2789				26.4651	21.5886		14.588
2004	14.3854	26.7777	13.7332	45.7077	13.045	7.56856	14.067	12.9473		12.804	16.0914	14.9362	13.8318											8.54575	20.9859						9.66627				10.6209	11.3887			9.12276				25.5339	23.8302		13.4878
2005	12.7905	24.7555	13.5351		11.7653	8.16901	13.7267	12.3199		11.5068	15.5453	14.3998	12.6532											7.84396	15.3623						8.85618				9.15236	10.0469			8.74682				24.8767	18.3898		12.1618
2006	12.7552	19.9427	13.1782		11.4674	8.66205	12.8727	10.9502		10.8316	13.9474	14.3105												6.699							7.78648				10.0112	11.0122			9.29331				22.3516	16.0416		11.7037
2007	13.8721	18.832	12.0611		10.3606	9.22031	12.5669	10.6593		11.2087	13.3671	12.9669				6.69574								6.87139	10.6738						7.29485				10.2226	8.74914			9.05513				21.8098	12.8547		11.9361
2008	13.6049	17.5825	10.868		8.94466	9.68999	11.4276	9.37355		11.3322	11.6018	12.2229				5.97775								5.0326	8.91522						8.38997				14.4879	7.62912			9.66236				17.61	10.5809		11.6571
2009	15.9576	18.5101	12.7726		9.45271	7.55034	12.6522	10.1234		14.9008	12.9059	12.3189	13.1817			7.05769								5.377	10.4772						9.21284				15.1262	9.23285			10.6355				18.4522	11.8797		12.197
2010	17.5774	19.9419	13.8572		10.5532	7.176	12.2071	11.8208		14.2809	12.5383	13.149	11.7938			6.13433								5.43685	10.4539						7.99093				14.66	8.49905			11.3827				19.8907	13.122		12.7372
2011	12.6348	18.937	11.2509		9.71967		12.626	11.7455		19.2967	11.4813	13.3252	11.6027			5.48477								4.51452	5.83471						6.89897				16.4987				10.9091				16.0876	15.0017		12.9148

[truncated: 30 more sheets: EIRp_NG_Ind, EIRp_NG_Elec, EIRp_Oil, PctGDPonOil_Estimated, PctGDP_NGRes_Estimated, PctGDP_NGInd_Estimated, PctGDP_NGElec_Estimated, PctGDP_CoalRes_Estimated, PctGDP_CoalInd_Estimated, PctGDP_CoalElec_Estimated, PctGDP_ElecInd_Estimated, PctGDP_ElecRes_Estimated, PctGDP_NFElecInd_Estimated, PctGDP_NFElecRes_Estimated, PctGDPonOil_Actual, PctGDP_ElecRes_Actual, PctGDP_ElecInd_Actual, PctGDP_NFElecRes_Actual, PctGDP_NFElecInd_Actual, PctGDP_NGRes_Actual …]
